# Supplementary material
Source: PubMed Central journal article supplement (PMC2956425)
Supplement: NIHMS232437-supplement-01.pdf [file NIHMS232437-supplement-01.pdf]

ONLINE REPOSITORY

Letter to the Editor

**Man's best friend? The effect of pet ownership on house dust microbial communities**

**Man's best friend? The effect of pet ownership on house dust microbial communities**

<sup>1</sup>Fujimura, Kei E., Ph.D., <sup>2</sup>Johnson, Christine C. Ph.D., <sup>3</sup>Ownby, Dennis R., M.D.,  
<sup>1</sup>Cox, Michael J., Ph.D., <sup>4</sup>Brodie, Eoin L., Ph.D., <sup>2</sup>Havstad, Suzanne L., M.A.,  
<sup>5</sup>Zoratti, Edward M., M.D., <sup>2</sup>Woodcroft, Kimberley J., Ph.D., <sup>2</sup>Bobbitt, Kevin R.,  
Ph.D., <sup>2</sup>Wegienka, Ganesa, Ph.D., <sup>6</sup>Boushey, Homer A., M.D., <sup>1\*</sup>Lynch, Susan V.,  
Ph.D.

<sup>1</sup>Colitis and Crohn's Disease Center, Division of Gastroenterology, <sup>6</sup>Division of  
Pulmonary and Critical Care, Department of Medicine, University of California, San  
Francisco, 513 Parnassus Ave., San Francisco, CA 94143; <sup>2</sup> Department of  
Biostatistics and Research Epidemiology, <sup>5</sup>Department of Internal Medicine,  
Division of Allergy and Immunology 1 Ford Place, Detroit Michigan 48202-3450;  
<sup>3</sup>Department of Pediatrics, Division of Allergy-Immunology, BG 1019, 1120 15th  
Street, Augusta, GA 30912-3790; <sup>4</sup>Center for Environmental Biotechnology,  
Lawrence Berkeley National Laboratory, Berkeley, CA.

Corresponding author: Susan Lynch, Ph.D., Tel. +415 4766784; Fax,

+4154768841; Email: [susan.lynch@ucsf.edu](mailto:susan.lynch@ucsf.edu)

## **Methods.**

### **Sample collection.**

House dust specimens were available from a population-based birth cohort, a subset of these, collected from participants who had subsequently dropped from the cohort, but were clearly characterized with respect to the presence or absence of a dog or a cat at the time of, and in the preceding six months prior to sample collection, were used for this study. Sixteen dust samples collected from households in the greater Detroit area with  $\geq 1$  dogs (D; n = 6),  $\geq 1$  cats (C; n = 5) or no furred pets (NP; n = 5) were used. Animal behavior was determined by completion of a questionnaire by the pet owner. Housekeeping Index, using a Likert scale, was based on the following question, "How would you rate the general condition of the dwelling?", with responses falling under the following categories: 1 extremely poor housekeeping; 2 not as bad as 1; 3 average level of housekeeping; 4 above average; 5 good housekeeping award. Field staff were given defined guidelines for assessing the overall cleanliness of the study participant's home.

They were asked to take into account evidence of cockroaches and mice in the home as well as signs of mold or water damage and to consider whether there was any visible damage to the interior and how cluttered the home was.

Samples were collected using a standardized method of vacuuming 1 m<sup>2</sup> of a home floor or mattress for 2 minutes into a collection sock. Pet ownership was defined as households that housed a dog or cat for at least 45 days before sampling. Samples were filtered through a 300 µM sterile filter to remove large debris, fine dust filtrate was stored at -80 °C until processed.

### **DNA extraction and processing for PhyloChip analysis.**

DNA was extracted from 0.1 g of dust using a modified cetyl trimethylammonium bromide (CTAB) and (polyethylene glycol (PEG) method (<sup>41</sup>; see Online Repository). Details of sample processing for PhyloChip analysis is provided in the Online Repository. Background subtraction and normalization were carried out as previously described<sup>42</sup>. Data sets were conservatively filtered, with taxa (defined as

groups of organisms detected by the array that possess at least 97% 16S rRNA sequence homology) deemed present if  $\geq 90\%$  of probes per probe set were positive as previously described<sup>42</sup>.

### **Fungal community analysis.**

DNA extracted from house dust was used to profile fungal communities present. A total of 10 ng of extracted DNA was used in a 35 cycle PCR reaction using fungal-specific ITS primers [ITS1 5'-TCCGTAGGTGAACCTGCGG-3' and ITS4 5'-TCCTCCGCTTATT GATATGC-3';<sup>43</sup>] to amplify this region from fungal species present in these communities (detailed in Online Repository). A total of 2  $\mu$ l of PCR product was resolved using an Agilent DNA Chip100 kit for the Agilent 2100 bioanalyzer (Agilent, CA) according to the manufacturers instructions. Sample traces were analyzed using Agilent 2100 Expert software to enumerate the number of peaks (representing fungal richness).

The Invitrogen TOPO TA cloning kit (Carlsbad, CA) was used to generate fungal clone libraries for each sample (detailed in Online Repository). Restriction fragment length polymorphism analysis (detailed in Online Repository) analysis was performed (on 96 clones per library) and plasmids encoding distinct bands representing discrete fungal ribotypes, were purified using the QIAprep Spin Miniprep Kit (Qiagen) prior to bidirectional sequencing (Agencourt Bioscience, MA) using M13 primers. Sequences were trimmed for quality, assembled using Geneious 4.7 ([www.geneious.com](http://www.geneious.com)), and identity assigned by BLAST searching based on the percent homology, E-value, and bit score.

### **Statistical Analyses.**

Bacterial community richness (number of taxa detected by the array), Pielou's evenness (metric describing the relative distribution of taxa in a given community), and Simpson's inverse diversity (calculated based on richness and evenness metrics) were calculated using the *vegan* package<sup>44</sup> in R (<http://www.R->

project.org). Wilcoxon or Welch's t-test was used to determine significant differences in community metrics (diversity, richness and evenness) and taxon abundance across comparison groups. Q-value false discovery rates were calculated as previously described<sup>45</sup>. To examine if a relationship existed between fungal and bacterial diversity in house dust samples, Pearson's correlation was assessed using 2-sided *cor.test* in the statistical package in R with a confidence interval of 0.95. PhyloChip fluorescence intensities were square root transformed by the *metaMDSdist* script, prior to generation of a Bray-Curtis distance matrix in the *vegan* package<sup>44</sup>. Hierarchical cluster analysis (HCA<sup>46</sup>), an exploratory tool to examine community composition dissimilarity, was generated using this distance matrix with the average mean distance option in the *stat* package of R. Results of HCA were illustrated using iTOL<sup>47</sup>.

## Tables

**Table E1. Bacterial community metrics, fungal richness, and pet information of house dust samples.**

| <i>Sample</i> | <i>Exposure</i> | <i>Bacterial Richness</i> | <i>Bacterial Evenness</i> | <i>Bacterial Diversity</i> | <i>Fungal Richness</i> | <i>Pet hours indoors / outdoors</i> |
|---------------|-----------------|---------------------------|---------------------------|----------------------------|------------------------|-------------------------------------|
| 1             | D <sup>a</sup>  | 1561                      | 0.689                     | 1427.4                     | 2                      | 20/4                                |
| 2             | D               | 1615                      | 0.689                     | 1505.1                     | 3                      | 23/1                                |
| 3             | D               | 1660                      | 0.688                     | 1518.6                     | 3                      | 0/24                                |
| 4             | D               | 1246                      | 0.684                     | 1054.8                     | 5                      | 23/1                                |
| 5             | D               | 1130                      | 0.686                     | 998.5                      | 4                      | 0/24                                |
| 6             | C <sup>b</sup>  | 1078                      | 0.683                     | 903.6                      | 5                      | 16/8                                |
| 7             | C               | 984                       | 0.687                     | 881.7                      | 5                      | 24/0                                |
| 8             | C               | 1617                      | 0.688                     | 1463.4                     | 4                      | 24/0                                |
| 9             | C               | 1236                      | 0.688                     | 1119.0                     | 5                      | 12/12                               |
| 10            | C               | 1236                      | 0.687                     | 1105.8                     | 8                      | 24/0                                |
| 11            | NP              | 878                       | 0.684                     | 735.7                      | 5                      | 0/0                                 |
| 12            | NP              | 1071                      | 0.686                     | 939.4                      | 6                      | 0/0                                 |
| 13            | NP              | 978                       | 0.685                     | 850.2                      | 8                      | 0/0                                 |

D<sup>a</sup>= household with  $\geq 1$  dog; C<sup>b</sup> = household with  $\geq 1$  cat; NP<sup>c</sup> = household with no cat or dog.

Shaded samples belong to high bacterial diversity HCA cluster G1.

**Man's best friend?**

**The effect of pet ownership on house-dust microbial communities.**

**Online Repository**

<sup>1</sup>Fujimura, Kei E., Ph.D., <sup>2</sup>Johnson, Christine C. Ph.D., <sup>3</sup>Ownby, Dennis R., M.D., <sup>1</sup>Cox, Michael J., Ph.D., <sup>4</sup>Brodie, Eoin L., Ph.D., <sup>2</sup>Havstad, Suzanne L., M.A., <sup>5</sup>Zoratti, Edward M., M.D., <sup>2</sup>Woodcroft, Kimberley J., Ph.D., <sup>2</sup>Bobbitt, Kevin R., Ph.D., <sup>2</sup>Wegienka, Ganesa, Ph.D., <sup>6</sup>Boushey, Homer A., M.D., <sup>1\*</sup>Lynch, Susan V., Ph.D.

Division of <sup>1</sup>Gastroenterology, <sup>6</sup>Pulmonary and Critical Care, Department of Medicine, University of California, San Francisco, 513 Parnassus Ave., San Francisco, CA 94143; <sup>2</sup> Department of Biostatistics and Research Epidemiology, <sup>5</sup>Department of Internal Medicine, Division of Allergy and Immunology 1 Ford Place, Detroit Michigan 48202-3450; <sup>3</sup>Department of Pediatrics, Division of Allergy-Immunology, BG 1019, 1120 15th Street, Augusta, GA 30912-3790; <sup>4</sup>Center for Environmental Biotechnology, Lawrence Berkeley National Laboratory, Berkeley, CA.

Corresponding author: Susan Lynch, Ph.D., Tel. +415 4766784; Fax, +4154768841; Email: [susan.lynch@ucsf.edu](mailto:susan.lynch@ucsf.edu)



**Table E2. Bacterial taxa detected in significantly higher abundance in dog vs no pet households.**

| <i>Phylum</i>   | <i>S-F<sup>a</sup></i> | <i>Taxon ID<sup>b</sup></i> | <i>Representative species<sup>c</sup></i>                | <i>p-value</i> | <i>q-value</i> |
|-----------------|------------------------|-----------------------------|----------------------------------------------------------|----------------|----------------|
| Bacteroidetes   | sf_1                   | 5295                        | swine intestine clone p-987-s962-5                       | 0.000860288    | 0.03133258     |
| Actinobacteria  | sf_1                   | 1558                        | <i>Corynebacterium</i> sp. str. 61722                    | 0.000915893    | 0.03133258     |
| Actinobacteria  | sf_1                   | 1575                        | <i>Corynebacterium matruchotii</i> str. DSM 20635        | 0.001730035    | 0.03133258     |
| Firmicutes      | sf_12                  | 3019                        | <i>Tepidibacter formicigenes</i> str. DV1184             | 0.001819953    | 0.03133258     |
| Bacteroidetes   | sf_1                   | 6011                        | rumen clone F24-B03                                      | 0.00192834     | 0.03133258     |
| Spirochaetes    | sf_1                   | 6575                        | TCE-contaminated site clone ccsIm226                     | 0.002453832    | 0.03133258     |
| Firmicutes      | sf_12                  | 4637                        | termite gut clone Rs-088                                 | 0.002699018    | 0.03133258     |
|                 |                        |                             | midgut homogenate <i>Pachnoda ephippiata</i> larva clone |                |                |
| TM7             | sf_1                   | 2697                        | PeM47                                                    | 0.003250189    | 0.03133258     |
| Firmicutes      | sf_3                   | 2373                        |                                                          | 0.003584048    | 0.03133258     |
| Firmicutes      | sf_1                   | 4044                        |                                                          | 0.004042678    | 0.03133258     |
|                 |                        |                             | uranium mining waste pile clone JG37-AG-15               |                |                |
| Proteobacteria  | sf_3                   | 9735                        | proteobacterium                                          | 0.004622903    | 0.03133258     |
| Actinobacteria  | sf_3                   | 1114                        |                                                          | 0.005140712    | 0.03133258     |
| Verrucomicrobia | sf_1                   | 1024                        | rumen clone BS5                                          | 0.005507634    | 0.03133258     |
| Actinobacteria  | sf_1                   | 1856                        | forested wetland clone RCP2-105                          | 0.005936504    | 0.03133258     |
| Firmicutes      | sf_1                   | 2388                        | G+C Gram-positive clone YNPRH70A                         | 0.00646989     | 0.03133258     |
| Acidobacteria   | sf_6                   | 6362                        | grassland soil clone DA052                               | 0.006729145    | 0.03133258     |
| Proteobacteria  | sf_1                   | 10248                       | <i>Desulfovibrio giganteus</i> str. DSM 4370             | 0.007208291    | 0.03133258     |
| Spirochaetes    | sf_1                   | 6506                        | termite gut homogenate clone Rs-J58 sp.                  | 0.007548222    | 0.03133258     |
| Proteobacteria  | sf_3                   | 8114                        |                                                          | 0.007569625    | 0.03133258     |
| Spirochaetes    | sf_1                   | 6488                        | <i>Treponema primitia</i> str. ZAS-1                     | 0.00757132     | 0.03133258     |
| Proteobacteria  | sf_3                   | 10309                       | <i>Nannocystis exedens</i> str. Na e571                  | 0.007730697    | 0.03133258     |
| Proteobacteria  | sf_3                   | 6628                        | <i>Wolbachia pipientis</i>                               | 0.008279464    | 0.03133258     |
| Spirochaetes    | sf_1                   | 6494                        | termite gut homogenate clone Rs-C47 sp.                  | 0.008396102    | 0.03133258     |
| Spirochaetes    | sf_1                   | 6491                        | termite gut homogenate clone BCf8-03                     | 0.00849645     | 0.03133258     |
| Proteobacteria  | sf_1                   | 10084                       | acid mine drainage clone AS6                             | 0.008748161    | 0.03133258     |
| Spirochaetes    | sf_1                   | 6565                        | termite gut clone NkS-Oxy25                              | 0.009290302    | 0.03133258     |
| Firmicutes      | sf_1                   | 3975                        | Black raspberry witches'-broom phytoplasma str. BRWB     | 0.0108543      | 0.03133258     |

| witches'-broom  |       |       |                                                       |            |            |
|-----------------|-------|-------|-------------------------------------------------------|------------|------------|
| Spirochaetes    | sf_1  | 6532  | termite gut clone NkS39                               | 0.01093518 | 0.03133258 |
| Proteobacteria  | sf_9  | 10049 | DCP-dechlorinating consortium clone SHA-72            | 0.01153983 | 0.03133258 |
| Unclassified    | sf_92 | 9999  | termite gut homogenate clone Rs-J96                   | 0.01168807 | 0.03133258 |
| Actinobacteria  | sf_1  | 1544  | <i>Kitasatospora cystarginea</i> str. IFO14836T       | 0.01191364 | 0.03133258 |
|                 |       |       | Mixotricha paradoxa is flagellate hindgut Mastotermes |            |            |
| Spirochaetes    | sf_1  | 6571  | darwiniensis clone mp4 of                             | 0.01193115 | 0.03133258 |
| Proteobacteria  | sf_3  | 10417 | temperate estuarine mud clone KM61                    | 0.01200276 | 0.03133258 |
| Proteobacteria  | sf_9  | 9784  | Antarctic sediment clone LH5_30                       | 0.01213724 | 0.03133258 |
| Proteobacteria  | sf_3  | 10534 | <i>Helicobacter pylori</i>                            | 0.0124312  | 0.03133258 |
| Bacteroidetes   | sf_1  | 6269  | acidic forest soil clone UC1                          | 0.01248821 | 0.03133258 |
| Spirochaetes    | sf_1  | 6460  | termite gut homogenate clone Rs-B69 sp.               | 0.01263646 | 0.03133258 |
| Firmicutes      | sf_1  | 3630  |                                                       | 0.01279401 | 0.03133258 |
|                 |       |       | UASB reactor granular sludge clone PD-UASB-2          |            |            |
| Proteobacteria  | sf_1  | 10497 | proteobacterium                                       | 0.01351734 | 0.03133258 |
| Bacteroidetes   | sf_1  | 6012  | mouse feces clone L11-6                               | 0.01354004 | 0.03133258 |
| Proteobacteria  | sf_3  | 6803  | <i>Wolbachia</i> sp. Dlem16SWol                       | 0.0135749  | 0.03133258 |
| Actinobacteria  | sf_1  | 1454  | <i>Nocardia yamanashiensis</i> str. IFM 0265          | 0.01379599 | 0.03133258 |
| Firmicutes      | sf_1  | 3961  | Clover yellow edge mycoplasma-like organism           | 0.01380174 | 0.03133258 |
| Firmicutes      | sf_5  | 668   | <i>Sedimentibacter</i> sp. str. BRS2                  | 0.01415744 | 0.03133258 |
| Spirochaetes    | sf_1  | 6579  | termite gut clone NkS83                               | 0.01452437 | 0.03133258 |
| WS3             | sf_1  | 2537  | anoxic marine sediment clone LD1-PA39                 | 0.01461253 | 0.03133258 |
| Verrucomicrobia | sf_3  | 792   | termite gut homogenate clone Rs-P07 bacterium         | 0.01464949 | 0.03133258 |
|                 |       |       | soil sample uranium mining waste pile near town       |            |            |
| Acidobacteria   | sf_14 | 6405  | Johanngeorgenstadt clone JG36-TzT-31 bacterium        | 0.01474821 | 0.03133258 |
| Actinobacteria  | sf_1  | 1312  |                                                       | 0.01498466 | 0.03133258 |
| Actinobacteria  | sf_1  | 2048  | <i>Nocardia uniformis</i> str. DSM 43136              | 0.01539902 | 0.03133258 |
| Firmicutes      | sf_12 | 4502  |                                                       | 0.01543917 | 0.03133258 |
| Firmicutes      | sf_1  | 3488  | <i>Halobacillus salinus</i> str. HSL-3                | 0.01557008 | 0.03133258 |
| Actinobacteria  | sf_1  | 1893  | <i>Kineosporia aurantiaca</i> str. NRLL B-16913       | 0.01560354 | 0.03133258 |
| Proteobacteria  | sf_3  | 10438 | hydrocarbon seep clone GCA014                         | 0.01561483 | 0.03133258 |
| Bacteroidetes   | sf_1  | 5460  | mouse feces clone F8                                  | 0.01564666 | 0.03133258 |
| Proteobacteria  | sf_1  | 10071 | <i>Desulfovibrio desulfuricans</i>                    | 0.01589283 | 0.03133258 |

|                 |        |       |                                                                                             |            |            |
|-----------------|--------|-------|---------------------------------------------------------------------------------------------|------------|------------|
| Spirochaetes    | sf_1   | 6526  | <i>Treponema</i> sp. str. 7CPL208                                                           | 0.01589774 | 0.03133258 |
| Proteobacteria  | sf_1   | 10407 | hydrothermal sediment clone AF420342                                                        | 0.01600835 | 0.03133258 |
| Spirochaetes    | sf_1   | 6554  | termite gut homogenate clone Rs-A43 sp.                                                     | 0.01608096 | 0.03133258 |
| Proteobacteria  | sf_3   | 10484 | <i>Campylobacter helveticus</i>                                                             | 0.01652224 | 0.03133258 |
| Proteobacteria  | sf_3   | 9321  | marine sediment clone Tokyo Bay D<br>anaerobic VC-degrading enrichment clone VC10           | 0.01666009 | 0.03133258 |
| Bacteroidetes   | sf_11  | 5619  | bacterium<br>Mono Lake at depth 23 m station 6 July 2000 clone                              | 0.01666736 | 0.03133258 |
| Proteobacteria  | sf_1   | 10187 | ML623J-57 proteobacterium                                                                   | 0.0168146  | 0.03133258 |
| Synergistes     | sf_3   | 60    | <i>Flexistipes</i> sp. str. E3_33                                                           | 0.01683209 | 0.03133258 |
| Firmicutes      | sf_11  | 181   | <i>Allisonella histaminiformans</i> str. MR2                                                | 0.01685951 | 0.03133258 |
| Spirochaetes    | sf_1   | 6523  | termite gut homogenate clone Rs-J64 sp.                                                     | 0.01689763 | 0.03133258 |
| Proteobacteria  | sf_1   | 8962  | bacterioplankton clone AEGEAN_234                                                           | 0.01693148 | 0.03133258 |
| Actinobacteria  | sf_1   | 2061  | rice straw paddy soil isolate str. WB2<br>Mono Lake at depth 35 m station 6 July 2000 clone | 0.01830901 | 0.03133258 |
| Bacteroidetes   | sf_4   | 5785  | ML635J-56                                                                                   | 0.01845986 | 0.03133258 |
| Proteobacteria  | sf_1   | 10475 | hydrothermal sediment clone AF420359                                                        | 0.01855131 | 0.03133258 |
| Actinobacteria  | sf_1   | 1867  | <i>Amycolatopsis vancore-smycina</i> str. DSM 44592                                         | 0.01863488 | 0.03133258 |
| Proteobacteria  | sf_3   | 10540 | <i>Campylobacter showae</i> str. LMG 12636<br>uranium mining waste pile clone JG37-AG-128   | 0.0187843  | 0.03133258 |
| Proteobacteria  | sf_1   | 9845  | proteobacterium                                                                             | 0.01906774 | 0.03133258 |
| Proteobacteria  | sf_3   | 8477  | marine sediment clone Limfjorden L8                                                         | 0.01910501 | 0.03133258 |
| Unclassified    | sf_160 | 6430  |                                                                                             | 0.01925277 | 0.03133258 |
| Actinobacteria  | sf_1   | 1180  | <i>Mycobacterium palustre</i> str. E846                                                     | 0.0193872  | 0.03133258 |
| Firmicutes      | sf_17  | 926   |                                                                                             | 0.01941024 | 0.03133258 |
| Bacteroidetes   | sf_1   | 5828  | <i>Blattabacterium</i> species                                                              | 0.01942291 | 0.03133258 |
| Bacteroidetes   | sf_19  | 5366  | <i>Flexibacter roseolus</i> str. IFO 16030                                                  | 0.01944996 | 0.03133258 |
| Proteobacteria  | sf_1   | 9240  | <i>Pseudomonas fluorescens</i> str. CHA0                                                    | 0.01957325 | 0.03133258 |
| Bacteroidetes   | sf_1   | 5401  | <i>Capnocytophaga gingivalis</i> str. ChDC OS45                                             | 0.01968287 | 0.03133258 |
| Actinobacteria  | sf_1   | 1517  | <i>Corynebacterium xerosis</i> str. DSM 20743                                               | 0.0201329  | 0.03133258 |
| Verrucomicrobia | sf_1   | 547   | anoxic marine sediment clone LD1-PB1                                                        | 0.02034385 | 0.03133258 |
| Proteobacteria  | sf_1   | 9828  | termite gut homogenate clone Rs-M89 proteobacterium                                         | 0.02042882 | 0.03133258 |
| Proteobacteria  | sf_3   | 10428 | <i>Flexispira rappini</i> FH 9702248                                                        | 0.02051642 | 0.03133258 |
| Bacteroidetes   | sf_1   | 5955  | <i>Flavobacterium</i> sp. str. V4.MS.29 = MM_2747                                           | 0.02056903 | 0.03133258 |

|                  |        |       |                                                     |            |            |
|------------------|--------|-------|-----------------------------------------------------|------------|------------|
| Proteobacteria   | sf_23  | 10443 | <i>Helicobacter pylori</i> str. 85D08               | 0.02062707 | 0.03133258 |
| Proteobacteria   | sf_3   | 10576 | <i>Helicobacter</i> sp. 'liver 3' str. liver 3      | 0.02062707 | 0.03133258 |
| Actinobacteria   | sf_1   | 1551  | soil isolate Ellin301                               | 0.02064116 | 0.03133258 |
|                  |        |       | uranium mining waste pile clone JG34-KF-243         |            |            |
| Proteobacteria   | sf_3   | 9874  | proteobacterium                                     | 0.02064265 | 0.03133258 |
| Bacteroidetes    | sf_1   | 5473  |                                                     | 0.0206658  | 0.03133258 |
| Firmicutes       | sf_12  | 2764  |                                                     | 0.02097036 | 0.03133258 |
| Bacteroidetes    | sf_1   | 5317  | <i>Tenacibaculum maritimum</i> str. IFO 15946       | 0.0210302  | 0.03133258 |
| Bacteroidetes    | sf_1   | 5459  | <i>Pedobacter</i> sp. An13                          | 0.02112996 | 0.03133258 |
| Firmicutes       | sf_12  | 2898  | <i>Dorea longicatena</i> str. III-35                | 0.02114346 | 0.03133258 |
| Unclassified     | sf_160 | 10012 |                                                     | 0.02160459 | 0.03133258 |
| Synergistes      | sf_3   | 719   | <i>Synergistes</i> sp. P1 str. P4G_18               | 0.02181174 | 0.03133258 |
| Spirochaetes     | sf_1   | 6490  | termite gut homogenate clone BCf4-14                | 0.02185341 | 0.03133258 |
| Actinobacteria   | sf_1   | 1239  | <i>Mycobacterium ratisbonense</i> str. SD4          | 0.0218987  | 0.03133258 |
| Proteobacteria   | sf_3   | 10562 | <i>Helicobacter rappini</i> W.Tee-Yu                | 0.02194198 | 0.03133258 |
| Proteobacteria   | sf_2   | 7188  | termite gut homogenate clone Rs-B50 proteobacterium | 0.02204712 | 0.03133258 |
| Proteobacteria   | sf_3   | 10538 | <i>Arcobacter cryaerophilus</i>                     | 0.02217458 | 0.03133258 |
| Bacteroidetes    | sf_15  | 6046  | chlorobenzene-degrading consortium clone IIIB-1     | 0.02228797 | 0.03133258 |
| marine group A   | sf_1   | 6454  | marine clone SAR406                                 | 0.0223979  | 0.03133258 |
| Proteobacteria   | sf_1   | 10079 | <i>Desulfomicrobium baculatum</i> str. DSM 1742     | 0.02250462 | 0.03133258 |
| Bacteroidetes    | sf_1   | 5991  | <i>Tenacibaculum ovolyticum</i> str. IAM14318       | 0.0229782  | 0.03133258 |
| Acidobacteria    | sf_1   | 790   | soil clone 11-25                                    | 0.023016   | 0.03133258 |
| Proteobacteria   | sf_2   | 6639  |                                                     | 0.0231442  | 0.03133258 |
| Firmicutes       | sf_12  | 2736  | <i>Alkaliphilus metalliredigenes</i> str. QYMF      | 0.02324827 | 0.03133258 |
| Acidobacteria    | sf_1   | 87    | activated sludge clone 2951                         | 0.02336796 | 0.03133258 |
|                  |        |       | Mono Lake at depth 35m station 6 July 2000 clone    |            |            |
| Firmicutes       | sf_8   | 4536  | ML635J-14 G+C                                       | 0.02350543 | 0.03133258 |
| Proteobacteria   | sf_3   | 10436 | <i>Helicobacter aurati</i> str. MIT 97-5075c        | 0.02353168 | 0.03133258 |
| Gemmatimonadetes | sf_5   | 10112 | forest soil clone NOS7.157WL                        | 0.02396072 | 0.03133258 |
| Bacteroidetes    | sf_1   | 5961  | chlorobenzene-degrading consortium clone IA-16      | 0.02397067 | 0.03133258 |
| Proteobacteria   | sf_1   | 9469  | cf. <i>Pseudomonas</i> sp. clone Llangefni 52       | 0.0240601  | 0.03133258 |
| Unclassified     | sf_160 | 4410  |                                                     | 0.02413371 | 0.03133258 |
| Verrucomicrobia  | sf_3   | 40    | Elbe river clone DEV055                             | 0.02419767 | 0.03133258 |

|                 |       |       |                                                           |            |            |
|-----------------|-------|-------|-----------------------------------------------------------|------------|------------|
| Firmicutes      | sf_12 | 4638  |                                                           | 0.02421994 | 0.03133258 |
| Proteobacteria  | sf_3  | 10456 | <i>Campylobacter showae</i>                               | 0.02444631 | 0.03133258 |
| Spirochaetes    | sf_1  | 6508  | termite hindgut clone mpsp2                               | 0.02446658 | 0.03133258 |
| OP9/JS1         | sf_1  | 2491  | deep marine sediment clone MB-B2-103                      | 0.02450183 | 0.03133258 |
| Bacteroidetes   | sf_1  | 5267  | bacterioplankton clone AEGEAN_179                         | 0.024632   | 0.03133258 |
| Proteobacteria  | sf_4  | 6810  | marine bacterioplankton clone MB13F01                     | 0.02470768 | 0.03133258 |
| Verrucomicrobia | sf_1  | 559   | anoxic marine sediment clone LD1-PA20                     | 0.02480777 | 0.03133258 |
|                 |       |       | uranium mining waste pile clone JG37-AG-94                |            |            |
| Proteobacteria  | sf_1  | 9458  | proteobacterium                                           | 0.02481064 | 0.03133258 |
| Proteobacteria  | sf_3  | 10518 | <i>Helicobacter pylori</i> str. ATCC 49396T               | 0.02490654 | 0.03133258 |
| Actinobacteria  | sf_1  | 1888  | <i>Mycobacterium brisbanense</i> str. W6743; ATCC 49938   | 0.02510079 | 0.03133258 |
| Firmicutes      | sf_5  | 2710  | DCP-dechlorinating consortium clone SHA-74                | 0.02512473 | 0.03133258 |
| Chloroflexi     | sf_1  | 2485  |                                                           | 0.02516776 | 0.03133258 |
| Proteobacteria  | sf_28 | 10091 |                                                           | 0.025177   | 0.03133258 |
| TM6             | sf_1  | 9803  | forest soil clone S1204                                   | 0.02520617 | 0.03133258 |
| Proteobacteria  | sf_3  | 7010  | periodontal pocket clone 10B6                             | 0.02526757 | 0.03133258 |
| Bacteroidetes   | sf_4  | 5703  |                                                           | 0.02558316 | 0.03133258 |
| Firmicutes      | sf_5  | 3066  | <i>Clostridium methoxybenzovorans</i> str. SR3; DSM 12182 | 0.02576891 | 0.03133258 |
|                 |       |       | Mariana trough hydrothermal vent water 0.2micro-m         |            |            |
| Proteobacteria  | sf_4  | 7105  | filterable fraction clone MT-NB25                         | 0.0258226  | 0.03133258 |
| Proteobacteria  | sf_3  | 10463 | <i>Campylobacter</i> subsp. fetus                         | 0.02586973 | 0.03133258 |
| Proteobacteria  | sf_6  | 6986  | bacterioplankton clone AEGEAN_167                         | 0.02601555 | 0.03133258 |
| Firmicutes      | sf_1  | 77    | thermal soil clone YNPFFP9                                | 0.02609314 | 0.03133258 |
|                 |       |       | Guaymas Basin hydrothermal vent sediments clone           |            |            |
| OP9/JS1         | sf_1  | 2489  | B01R005                                                   | 0.02646754 | 0.03133258 |
| Proteobacteria  | sf_4  | 9733  | bacterioplankton clone ZA3735c                            | 0.02654204 | 0.03133258 |
|                 |       |       | <i>Corynebacterium simulans</i> National Microbiology     |            |            |
| Actinobacteria  | sf_1  | 1428  | Laboratory Special identifier 00-0186                     | 0.02696231 | 0.03133258 |
| Actinobacteria  | sf_1  | 1183  | <i>Actinomyces europaeus</i> str. CCUG 32789A             | 0.02698892 | 0.03133258 |
| Firmicutes      | sf_5  | 2804  | <i>Clostridium amygdalinum</i> str. BR-10                 | 0.0271011  | 0.03133258 |
| Firmicutes      | sf_12 | 2915  | <i>Tepidibacter thalassicus</i> str. SC 562               | 0.02712509 | 0.03133258 |
| Proteobacteria  | sf_3  | 10430 | <i>Helicobacter heilmannii</i> str. MM2                   | 0.02723718 | 0.03133258 |
| Proteobacteria  | sf_3  | 10425 | <i>Sulfurimonas autotrophica</i> str. OK5                 | 0.02725193 | 0.03133258 |
| Actinobacteria  | sf_3  | 2045  | hypersaline lake clone ML602J-44                          | 0.02733284 | 0.03133258 |

|                |       |       |                                                                                                                |            |            |
|----------------|-------|-------|----------------------------------------------------------------------------------------------------------------|------------|------------|
| Proteobacteria | sf_3  | 7275  | Mammoth cave clone CCU18<br>India: Himalayas Kaza Spiti Valley Cold Desert isolate                             | 0.0275147  | 0.03133258 |
| Proteobacteria | sf_1  | 6974  | str. Kaza-35 Kaza-35                                                                                           | 0.02761887 | 0.03133258 |
| Spirochaetes   | sf_1  | 6476  | termite gut clone NkS50                                                                                        | 0.02778509 | 0.03133258 |
| Acidobacteria  | sf_14 | 208   | uranium mill tailings soil sample clone GuBH2-AD-9 sp.<br>hydrothermal vent 9 degrees North East Rise Pacific  | 0.02791697 | 0.03133258 |
| Proteobacteria | sf_1  | 10530 | Ocean clone CH5_6_BAC_16SrRNA_9N_EPR                                                                           | 0.02833535 | 0.03133258 |
| Caldithrix     | sf_2  | 91    | benzoate-degrading consortium clone BA059                                                                      | 0.02859993 | 0.03133258 |
| Aquificae      | sf_1  | 737   | <i>Sulfurihydrogenibium azorense</i>                                                                           | 0.02881639 | 0.03133258 |
| Firmicutes     | sf_12 | 4610  | <i>Clostridium putrefaciens</i> str. DSM 1291                                                                  | 0.02895756 | 0.03133258 |
| Chloroflexi    | sf_9  | 94    | DCP-dechlorinating consortium clone SHA-2<br>marine sediment above hydrate ridge clone Hyd89-61                | 0.02900021 | 0.03133258 |
| Proteobacteria | sf_5  | 10267 | proteobacterium                                                                                                | 0.0290736  | 0.03133258 |
| Firmicutes     | sf_5  | 2937  | swine intestine clone p-2482-18B5                                                                              | 0.02916053 | 0.03133258 |
| Firmicutes     | sf_12 | 10457 | strain isolate str. Dex60-82                                                                                   | 0.02916651 | 0.03133258 |
| Proteobacteria | sf_3  | 10442 | <i>Helicobacter cetorum</i> str. MIT 99-5656                                                                   | 0.02941819 | 0.03133258 |
| Proteobacteria | sf_1  | 7768  | swine intestine clone p-861-a5                                                                                 | 0.02971797 | 0.03133258 |
| Bacteroidetes  | sf_1  | 6274  |                                                                                                                | 0.02977329 | 0.03133258 |
| Proteobacteria | sf_1  | 9709  | termite gut homogenate clone Rs-N31 proteobacterium<br>sediments collected at Charon's Cascade near Echo River | 0.02985348 | 0.03133258 |
| Chloroflexi    | sf_9  | 72    | October 2000 clone CCD21                                                                                       | 0.02986605 | 0.03133258 |
| Bacteroidetes  | sf_1  | 5914  | <i>Psychroserpens burtonensis</i> str. S2-64                                                                   | 0.03006146 | 0.03133258 |
| LD1PA group    | sf_1  | 10118 | anoxic marine sediment clone LD1-PA38                                                                          | 0.03018487 | 0.03133258 |
| Bacteroidetes  | sf_1  | 6272  | <i>Sphingobacterium heparinum</i>                                                                              | 0.03025171 | 0.03133258 |
| Actinobacteria | sf_1  | 1146  | <i>Nocardia otitidiscaviarum</i> str. S639                                                                     | 0.03030156 | 0.03133258 |
| Actinobacteria | sf_1  | 1119  | <i>Amycolatopsis tolypomycina</i> str. DSM 44544                                                               | 0.03030195 | 0.03133258 |
| Bacteroidetes  | sf_1  | 5492  | <i>Sphingobacterium</i> sp. str. HC-6155                                                                       | 0.03034372 | 0.03133258 |
| Acidobacteria  | sf_6  | 6359  | PCE-contaminated site clone CLi114                                                                             | 0.03042882 | 0.03133258 |
| Actinobacteria | sf_1  | 1917  | <i>Nocardia otitidiscaviarum</i> str. DSM43242                                                                 | 0.03053111 | 0.03133258 |
| Chloroflexi    | sf_1  | 765   | anaerobic bioreactor clone SHD-71                                                                              | 0.03057939 | 0.03133258 |
| Proteobacteria | sf_3  | 8741  | marine sediment clone Limfjorden L10<br>municipal wastewater treatment bioreactor isolate str.                 | 0.03061989 | 0.03133258 |
| Bacteroidetes  | sf_1  | 6158  | CAGY10                                                                                                         | 0.03062312 | 0.03133258 |
| Proteobacteria | sf_1  | 8896  | silica sinter depositing geothermal power station discharge                                                    | 0.03063729 | 0.03133258 |

| drain clone ST01-SN4A proteobacterium |       |       |                                                                            |            |            |
|---------------------------------------|-------|-------|----------------------------------------------------------------------------|------------|------------|
| OD1                                   | sf_1  | 515   |                                                                            | 0.0309065  | 0.03133258 |
| Spirochaetes                          | sf_1  | 6568  | <i>Spirochaeta</i> sp                                                      | 0.0309648  | 0.03133258 |
| Actinobacteria                        | sf_1  | 1834  | <i>Nocardia transvalensis</i> str. DSM 43405                               | 0.03096922 | 0.03133258 |
| Proteobacteria                        | sf_3  | 10548 | <i>Helicobacter rappini</i> W.Tee-Bat                                      | 0.03101991 | 0.03133258 |
| Bacteroidetes                         | sf_1  | 5521  | Flavobacteriaceae str. SW269                                               | 0.03106279 | 0.03133258 |
| Actinobacteria                        | sf_1  | 1104  | <i>Amycolatopsis mediterranei</i> str. NRRL B-3240                         | 0.0310754  | 0.03133258 |
| Proteobacteria                        | sf_3  | 10432 | <i>Riftia pachyptila</i> 's tube clone R76-B51                             | 0.03113299 | 0.03133258 |
| Bacteroidetes                         | sf_19 | 5728  | <i>Cytophaga</i> sp. str. MBIC04693                                        | 0.03150707 | 0.03133258 |
| Proteobacteria                        | sf_3  | 10572 | <i>Helicobacter</i> sp                                                     | 0.03167141 | 0.03133258 |
| Proteobacteria                        | sf_3  | 10385 |                                                                            | 0.03167843 | 0.03133258 |
| Proteobacteria                        | sf_3  | 10451 | <i>Helicobacter heilmannii</i> str. C4S                                    | 0.03167843 | 0.03133258 |
| Actinobacteria                        | sf_1  | 1355  | <i>Amycolatopsis mediterranei</i> str. IMSNU 20056T                        | 0.03181102 | 0.03133258 |
| Spirochaetes                          | sf_1  | 6529  | termite gut homogenate clone BCf10-21                                      | 0.03188088 | 0.03133258 |
| Proteobacteria                        | sf_3  | 6908  | <i>Rhinocyllus conicus</i> endosymbiont                                    | 0.03193098 | 0.03133258 |
| Bacteroidetes                         | sf_1  | 5901  | Arctic sea ice ARK10159                                                    | 0.03199243 | 0.03133258 |
| Actinobacteria                        | sf_1  | 1360  | forested wetland clone RCP2-103                                            | 0.0320137  | 0.03133258 |
| Lentisphaerae                         | sf_5  | 10027 | <i>Cytophaga</i> sp. str. Dex80-43                                         | 0.03205003 | 0.03133258 |
| Actinobacteria                        | sf_1  | 1860  | <i>Mycobacterium marinum</i>                                               | 0.03209162 | 0.03133258 |
| Actinobacteria                        | sf_1  | 1111  | <i>Kitasatospora setae</i> str. KM-6054                                    | 0.03211718 | 0.03133258 |
| Acidobacteria                         | sf_1  | 435   | anaerobic VC-degrading enrichment clone VC47 bacterium                     | 0.03224751 | 0.03133258 |
| Actinobacteria                        | sf_1  | 1781  | <i>Mycobacterium rhodesiae</i> str. JS60                                   | 0.03238783 | 0.03133258 |
| Actinobacteria                        | sf_1  | 1885  | <i>Mycobacterium neoaurum</i> str. ATCC 25795                              | 0.03238783 | 0.03133258 |
| Chlorobi                              | sf_6  | 5294  | Mammoth cave clone CCM9b                                                   | 0.03275735 | 0.03133258 |
| Actinobacteria                        | sf_1  | 1187  | <i>Mycobacterium aichiense</i> str. JS618                                  | 0.032761   | 0.03133258 |
| Firmicutes                            | sf_5  | 3017  | termite gut homogenate clone Rs-D48 bacterium                              | 0.03279771 | 0.03133258 |
| Actinobacteria                        | sf_1  | 1639  | <i>Streptomyces coelicolor</i> str. M145 ssp. A3(2)                        | 0.03288446 | 0.03133258 |
| Proteobacteria                        | sf_3  | 10447 | <i>Sulfurospirillum deleyianum</i> str. Spirillum 5175                     | 0.03295985 | 0.03133258 |
| Proteobacteria                        | sf_1  | 9598  | Mono Lake at depth 2 m station 6 July 2000 clone ML602J-47 proteobacterium | 0.03302136 | 0.03133258 |
| Actinobacteria                        | sf_1  | 1404  | freshwater isolate str. MWH-Ta3                                            | 0.03304374 | 0.03133258 |
| Actinobacteria                        | sf_1  | 1872  | <i>Dietzia maris</i>                                                       | 0.03304396 | 0.03133258 |

|                |       |       |                                                                                                                           |            |            |
|----------------|-------|-------|---------------------------------------------------------------------------------------------------------------------------|------------|------------|
| Actinobacteria | sf_1  | 1286  | <i>Frankia</i> sp. Sn5-8                                                                                                  | 0.03313284 | 0.03133258 |
| Proteobacteria | sf_1  | 9267  | <i>Pseudomonas syringae</i> pv. theae str. PT1                                                                            | 0.03318664 | 0.03133258 |
| Chloroflexi    | sf_1  | 927   | hydrothermal vent polychaete mucous clone P. palm C 37<br>uranium mining waste pile clone JG37-AG-30                      | 0.03327361 | 0.03133258 |
| Proteobacteria | sf_4  | 9741  | proteobacterium<br>ground water deep-well injection disposal site radioactive<br>wastes Tomsk-7 clone S15A-MN27 bacterium | 0.03331343 | 0.03133258 |
| Bacteroidetes  | sf_1  | 5915  |                                                                                                                           | 0.03358885 | 0.03133258 |
| Actinobacteria | sf_1  | 1567  |                                                                                                                           | 0.03387427 | 0.03133258 |
| Proteobacteria | sf_3  | 10397 | groundwater clone 1006                                                                                                    | 0.03394335 | 0.03133258 |
| Bacteroidetes  | sf_1  | 5946  | tongue dorsa clone DO027                                                                                                  | 0.03398571 | 0.03133258 |
| Firmicutes     | sf_1  | 3955  | Weeping tea tree witches'-broom phytoplasma tree                                                                          | 0.03403613 | 0.03133258 |
| Proteobacteria | sf_3  | 10050 | DCP-dechlorinating consortium clone SHA-51                                                                                | 0.034379   | 0.03133258 |
| Firmicutes     | sf_17 | 2324  |                                                                                                                           | 0.03439084 | 0.03133258 |
| Firmicutes     | sf_5  | 3111  | rumen clone 6C3d-11                                                                                                       | 0.03491031 | 0.03133258 |
| Actinobacteria | sf_1  | 1261  | <i>Nocardia caishijiensis</i> str. F829                                                                                   | 0.03493306 | 0.03133258 |
| Proteobacteria | sf_1  | 8131  |                                                                                                                           | 0.03505097 | 0.03133258 |
| Spirochaetes   | sf_1  | 6502  | <i>Treponema denticola</i> str. ATCC35405                                                                                 | 0.03518012 | 0.03133258 |
| Proteobacteria | sf_1  | 10480 | hydrothermal vent polychaete mucous clone P. palm C 84                                                                    | 0.03541466 | 0.03133258 |
| Proteobacteria | sf_2  | 7043  | marine clone Arctic95D-8                                                                                                  | 0.0354164  | 0.03133258 |
| Cyanobacteria  | sf_1  | 5008  | <i>Synechococcus</i> sp. str. PCC 7502                                                                                    | 0.03544292 | 0.03133258 |
| Proteobacteria | sf_1  | 10543 | hydrothermal vent clone PVB_10                                                                                            | 0.03547007 | 0.03133258 |
| Proteobacteria | sf_3  | 7481  | <i>Wolbachia pipientis</i>                                                                                                | 0.03565544 | 0.03133258 |
| Firmicutes     | sf_17 | 3476  |                                                                                                                           | 0.03565828 | 0.03133258 |
| Firmicutes     | sf_1  | 3289  | <i>Isobaculum melis</i> CCUG 37660T                                                                                       | 0.03567713 | 0.03133258 |
| Firmicutes     | sf_12 | 3219  | Great Artesian Basin clone R82                                                                                            | 0.03573643 | 0.03133258 |
| Actinobacteria | sf_1  | 1770  | <i>Dactylosporangium roseum</i> str. DSM 43916                                                                            | 0.03581177 | 0.03133258 |
| marine group A | sf_1  | 6408  | Sargasso Sea                                                                                                              | 0.0359321  | 0.03133258 |
| Actinobacteria | sf_1  | 1901  | earthworm burrow isolate B33D1                                                                                            | 0.03609328 | 0.03133258 |
| Bacteroidetes  | sf_19 | 5563  | <i>Cytophaga</i> sp. I-545                                                                                                | 0.03618804 | 0.03133258 |
| Bacteroidetes  | sf_1  | 5480  | ED5 earthworm gut                                                                                                         | 0.03621907 | 0.03133258 |
| Proteobacteria | sf_20 | 2520  |                                                                                                                           | 0.03669873 | 0.03133258 |
| Firmicutes     | sf_12 | 3049  | <i>Clostridium paradoxum</i> str. DSM 7308T                                                                               | 0.03693858 | 0.03133258 |
| Proteobacteria | sf_1  | 9486  | Marine isolate str. GK-2001                                                                                               | 0.03714535 | 0.03133258 |



|                 |        |       |                                                                                                                                                               |            |            |
|-----------------|--------|-------|---------------------------------------------------------------------------------------------------------------------------------------------------------------|------------|------------|
| Planctomycetes  | sf_3   | 4704  | aerobic basin clone CY0ARA025E11<br>Guaymas Basin hydrothermal vent sediments clone                                                                           | 0.03750463 | 0.03133258 |
| Proteobacteria  | sf_5   | 10136 | B01R011                                                                                                                                                       | 0.0377474  | 0.03133258 |
| Proteobacteria  | sf_6   | 7252  | bacterioplankton clone AEGEAN_108                                                                                                                             | 0.03778427 | 0.03133258 |
| Bacteroidetes   | sf_1   | 5482  |                                                                                                                                                               | 0.03790595 | 0.03133258 |
| Actinobacteria  | sf_1   | 1552  | <i>Nocardia cyriacigeorgica</i> str. D1627T                                                                                                                   | 0.03807711 | 0.03133258 |
| Proteobacteria  | sf_1   | 7762  | Elbe River snow isolate Iso18 Iso18_1411                                                                                                                      | 0.0380896  | 0.03133258 |
| Actinobacteria  | sf_1   | 1432  | <i>Nocardia veterana</i> str. DSM 44445                                                                                                                       | 0.03811564 | 0.03133258 |
| Spirochaetes    | sf_1   | 6562  | forested wetland clone RCP1-96                                                                                                                                | 0.038254   | 0.03133258 |
| Proteobacteria  | sf_1   | 8755  | <i>Pseudomonas</i> sp. SK-1-3-1                                                                                                                               | 0.03854822 | 0.03133258 |
| Bacteroidetes   | sf_1   | 5942  |                                                                                                                                                               | 0.03874601 | 0.03133258 |
| Firmicutes      | sf_5   | 3033  | human colonic clone HuCA15                                                                                                                                    | 0.03904052 | 0.03133258 |
| Verrucomicrobia | sf_3   | 486   | Elbe river clone DEV045                                                                                                                                       | 0.03904737 | 0.03133258 |
| Firmicutes      | sf_12  | 4548  | termite gut homogenate clone Rs-Q69 bacterium                                                                                                                 | 0.03935779 | 0.03133258 |
| Actinobacteria  | sf_1   | 1637  | <i>Mycobacterium austroafricanum</i> str. IFP2173                                                                                                             | 0.03946653 | 0.03133258 |
| Proteobacteria  | sf_3   | 8457  | 5' clone CHAB-XI-27                                                                                                                                           | 0.03962898 | 0.03133258 |
| Bacteroidetes   | sf_1   | 5436  | Arctic sea ice ARK10004                                                                                                                                       | 0.03979708 | 0.03133258 |
| Actinobacteria  | sf_1   | 1492  | <i>Corynebacterium tuscaniae</i> str. ISS-5309                                                                                                                | 0.03984708 | 0.03133258 |
| Proteobacteria  | sf_3   | 10444 | <i>Helicobacter suncus</i> str. Kaz-2                                                                                                                         | 0.03992517 | 0.03133258 |
| Firmicutes      | sf_5   | 4212  | termite gut clone Rs-061                                                                                                                                      | 0.03994182 | 0.03133258 |
| Actinobacteria  | sf_1   | 1766  | <i>Dactylosporangium salmonium</i> str. DSM 43910                                                                                                             | 0.04012421 | 0.03133258 |
| Firmicutes      | sf_1   | 3297  | <i>Aerococcus urinae</i> str. 1656-92                                                                                                                         | 0.04018357 | 0.03133258 |
| Firmicutes      | sf_5   | 2693  | ruminantium str. GA195                                                                                                                                        | 0.04027324 | 0.03133258 |
| Proteobacteria  | sf_1   | 10069 |                                                                                                                                                               | 0.04042032 | 0.03133258 |
| Bacteroidetes   | sf_1   | 5479  | <i>Flavobacterium frigoris</i> str. LMG 21471<br>ground water deep-well injection disposal site radioactive<br>wastes Tomsk-7 clone S15A-MN96 proteobacterium | 0.04076238 | 0.03133258 |
| Proteobacteria  | sf_1   | 7126  | USA: Colorado Fort collins Horsetooth Reservoir clone                                                                                                         | 0.0408119  | 0.03133258 |
| Actinobacteria  | sf_1   | 1317  | HTDD3                                                                                                                                                         | 0.04088223 | 0.03133258 |
| Actinobacteria  | sf_1   | 1698  | <i>Corynebacterium</i> subsp. afermentans str. CIP 103499T<br>uranium mining mill tailing clone GR-296.II.52 GR-                                              | 0.04099147 | 0.03133258 |
| Proteobacteria  | sf_2   | 594   | 296.I.52                                                                                                                                                      | 0.04106073 | 0.03133258 |
| Unclassified    | sf_160 | 6456  |                                                                                                                                                               | 0.04114194 | 0.03133258 |
| Proteobacteria  | sf_1   | 8433  | <i>Pseudomonas syringae</i> pv. broussonetiae str. KOZ 8101                                                                                                   | 0.04119676 | 0.03133258 |

|                     |       |       | pv.                                                                                       |            |            |
|---------------------|-------|-------|-------------------------------------------------------------------------------------------|------------|------------|
| Proteobacteria      | sf_1  | 7390  | <i>Afipia</i> genosp. 10 str. G8996                                                       | 0.04136049 | 0.03133258 |
| Bacteroidetes       | sf_1  | 5367  | patient's bronchoalveolar lavage isolate str. MDA2507 sp.                                 | 0.04154043 | 0.03133258 |
| Spirochaetes        | sf_1  | 6580  | <i>Treponema</i> sp. str. III:C:BA213                                                     | 0.04160631 | 0.03133258 |
| Proteobacteria      | sf_4  | 7157  | acid mine drainage clone ASL45                                                            | 0.04161215 | 0.03133258 |
| Bacteroidetes       | sf_6  | 5792  | activated sludge foam clone 47                                                            | 0.0416564  | 0.03133258 |
| Proteobacteria      | sf_1  | 10414 | penguin droppings sediments clone KD2-34                                                  | 0.04170286 | 0.03133258 |
| Proteobacteria      | sf_1  | 8062  | <i>Brackiella oedipodis</i> str. LMG 1945 R8846                                           | 0.04201794 | 0.03133258 |
| Proteobacteria      | sf_4  | 8169  | forested wetland clone RCP2-54                                                            | 0.04228357 | 0.03133258 |
| Firmicutes          | sf_5  | 4315  | termite gut homogenate clone Rs-N94 bacterium                                             | 0.04232885 | 0.03133258 |
| Cyanobacteria       | sf_5  | 5221  | picoplankton clone OM20                                                                   | 0.04249394 | 0.03133258 |
| Proteobacteria      | sf_1  | 9310  | <i>Pseudomonas</i> sp. str. AC-167                                                        | 0.04255034 | 0.03133258 |
| Actinobacteria      | sf_1  | 1304  | <i>Nocardia</i> sp. str. 99-08-244A                                                       | 0.04266145 | 0.03133258 |
| Proteobacteria      | sf_3  | 9498  |                                                                                           | 0.04270053 | 0.03133258 |
| Actinobacteria      | sf_1  | 2014  | marine sediment clone MB-A2-100                                                           | 0.0428089  | 0.03133258 |
| Proteobacteria      | sf_1  | 9351  | bacterioplankton clone ZA2333c                                                            | 0.04293982 | 0.03133258 |
| Proteobacteria      | sf_3  | 8321  | Wadden Sea sediment clone Dangast A9                                                      | 0.0429748  | 0.03133258 |
| Actinobacteria      | sf_1  | 1227  | <i>Actinomyces naeslundii</i>                                                             | 0.04304712 | 0.03133258 |
| Bacteroidetes       | sf_1  | 5903  | marine bacterioplankton clone MB11E04                                                     | 0.04322598 | 0.03133258 |
| Cyanobacteria       | sf_5  | 4984  | Cape Hatteras picoplankton clone OM164                                                    | 0.04322788 | 0.03133258 |
| Bacteroidetes       | sf_15 | 5511  | marine sediment above hydrate ridge clone Hyd-B2-1 bacterium                              | 0.04337386 | 0.03133258 |
| Proteobacteria      | sf_1  | 10427 | hydrothermal vent 9 degrees North East Rise Pacific Ocean clone CH3_17_BAC_16SrRNA_9N_EPR | 0.04345438 | 0.03133258 |
| Actinobacteria      | sf_1  | 1970  | <i>Dietzia</i> sp. str. E9_2                                                              | 0.0436654  | 0.03133258 |
| Deinococcus-Thermus | sf_2  | 637   | hypersaline pond clone LA7-B27N                                                           | 0.04372637 | 0.03133258 |
| Actinobacteria      | sf_1  | 1161  | <i>Frankia</i> sp. MRn2-2                                                                 | 0.04433727 | 0.03133258 |
| Bacteroidetes       | sf_1  | 5997  | <i>Flavobacterium aquatile</i>                                                            | 0.04477501 | 0.03133258 |
| TM7                 | sf_1  | 3025  |                                                                                           | 0.0448083  | 0.03133258 |
| Verrucomicrobia     | sf_1  | 530   | anoxic marine sediment clone LD1-PB20                                                     | 0.04490774 | 0.03133258 |
| Firmicutes          | sf_5  | 3089  | <i>Ruminococcus obeum</i>                                                                 | 0.04492827 | 0.03133258 |
| Proteobacteria      | sf_1  | 7139  | <i>Mesorhizobium loti</i> str. R8CS USDA 3467                                             | 0.04495827 | 0.03133258 |
| AD3                 | sf_1  | 2338  | uranium mining waste pile soil clone JG30-KF-C12                                          | 0.04498748 | 0.03133258 |

|                |        |       |                                                                 |            |            |
|----------------|--------|-------|-----------------------------------------------------------------|------------|------------|
| Proteobacteria | sf_3   | 9269  |                                                                 | 0.04499476 | 0.03133258 |
| Unclassified   | sf_160 | 6360  |                                                                 | 0.04500369 | 0.03133258 |
| Actinobacteria | sf_1   | 1884  | <i>Corynebacterium tuberculostearicum</i> str. ATCC 33035       | 0.04504225 | 0.03133258 |
| Firmicutes     | sf_5   | 2844  | <i>Pseudobutyrvibrio ruminis</i> str. pC-XS2                    | 0.04527833 | 0.03133258 |
| Actinobacteria | sf_1   | 1262  | <i>Mycobacterium holsaticum</i> str. 1406                       | 0.0454355  | 0.03133258 |
| Actinobacteria | sf_1   | 1229  | <i>Streptacidiphilus carbonis</i> str. JL 415; DSM 41754        | 0.04547963 | 0.03133258 |
| Firmicutes     | sf_5   | 3088  | <i>Clostridium sphenoides</i> str. DSM 632                      | 0.0455199  | 0.03133258 |
| Firmicutes     | sf_5   | 1037  | <i>Finegoldia magna</i>                                         | 0.04577731 | 0.03133258 |
| Proteobacteria | sf_3   | 9167  | pea aphid symbiont clone APe4_38                                | 0.04601092 | 0.03133258 |
| Proteobacteria | sf_1   | 8513  | <i>Pseudomonas monteilii</i> str. CIP 104883                    | 0.0460157  | 0.03133258 |
| Proteobacteria | sf_1   | 8561  | <i>Pseudomonas</i> sp. B65                                      | 0.04618102 | 0.03133258 |
| Actinobacteria | sf_1   | 1569  | <i>Streptomyces sampsonii</i> str. ATCC25495                    | 0.04630371 | 0.03133258 |
| Proteobacteria | sf_1   | 8546  | <i>Thiocapsa litoralis</i>                                      | 0.04631959 | 0.03133258 |
| Firmicutes     | sf_4   | 2398  | deep marine sediment clone MB-C2-106                            | 0.04657659 | 0.03133258 |
| Proteobacteria | sf_1   | 8140  | <i>Schlegelella</i> sp. str. KB1a                               | 0.0465991  | 0.03133258 |
| Firmicutes     | sf_5   | 4623  | human colonic clone HuCA1                                       | 0.04664543 | 0.03133258 |
| Spirochaetes   | sf_3   | 6470  | neutral pH mine biofilm clone 44a-B1-48                         | 0.04670421 | 0.03133258 |
| Actinobacteria | sf_1   | 1105  | <i>Frankia</i> sp                                               | 0.04674021 | 0.03133258 |
| Bacteroidetes  | sf_1   | 5601  | <i>Sphingobacterium multivorum</i> str. OM-A8                   | 0.04684498 | 0.03133258 |
| Actinobacteria | sf_1   | 1581  | <i>Cryptosporangium aurantiacum</i> str. IMSNU 22120            | 0.0469576  | 0.03133258 |
| Proteobacteria | sf_1   | 9282  |                                                                 | 0.04704916 | 0.03133258 |
| Proteobacteria | sf_1   | 8012  | <i>Acidovorax konjaci</i> str. DSM 7481                         | 0.04789895 | 0.03133258 |
| Proteobacteria | sf_3   | 10520 | <i>Helicobacter</i> sp. blood isolate 964                       | 0.04825001 | 0.03133258 |
| Actinobacteria | sf_1   | 1116  | <i>Gordona terrae</i>                                           | 0.04834643 | 0.03133258 |
| Proteobacteria | sf_1   | 7788  | atrazine-catabolizing microbial absence methanol clone KRA30-58 | 0.04848511 | 0.03133258 |
| Acidobacteria  | sf_14  | 6335  | forested wetland clone FW45                                     | 0.04852058 | 0.03133258 |
| Firmicutes     | sf_1   | 4046  | Pigeon pea witches'-broom mycoplasma-like organism              | 0.04852821 | 0.03133258 |
| Unclassified   | sf_95  | 2545  | anaerobic sludge isolate str. JE                                | 0.04874113 | 0.03133258 |
| Proteobacteria | sf_1   | 8196  |                                                                 | 0.04874598 | 0.03133258 |
| Actinobacteria | sf_1   | 1274  | <i>Trichotomospora caesia</i> str. IFO14562                     | 0.04879441 | 0.03133258 |
| Proteobacteria | sf_1   | 7067  | <i>Blastochloris sulfoviridis</i> str. GN1                      | 0.04882702 | 0.03133258 |
| Proteobacteria | sf_1   | 6964  | <i>Agrobacterium tumefaciens</i> str. C58 Cereon                | 0.04899273 | 0.03133258 |

|                |      |       |                                                           |            |            |
|----------------|------|-------|-----------------------------------------------------------|------------|------------|
| Proteobacteria | sf_1 | 7568  | <i>Rhizobium etli</i> str. USDA 2667 ATCC 14483 SEMIA 043 | 0.04901525 | 0.03133258 |
| Actinobacteria | sf_1 | 1723  | <i>Corynebacterium</i> sp str. CDC G5911                  | 0.0493076  | 0.03133258 |
| Actinobacteria | sf_1 | 1803  | <i>Corynebacterium spheniscorum</i> str. CCUG 45512       | 0.04936733 | 0.03133258 |
| Actinobacteria | sf_1 | 1545  |                                                           | 0.04946945 | 0.03133258 |
| Actinobacteria | sf_1 | 1668  | <i>Corynebacterium ulcerans</i> str. NCTC 7910            | 0.0495858  | 0.03133258 |
| Proteobacteria | sf_1 | 6822  |                                                           | 0.04960075 | 0.03133258 |
| Proteobacteria | sf_1 | 7101  |                                                           | 0.04960075 | 0.03133258 |
| Proteobacteria | sf_3 | 10298 | marine tidal mat clone BTM36                              | 0.04967707 | 0.03133258 |

<sup>a</sup>S-F = subfamily; <sup>b</sup>Taxon ID = Phylochip taxon identification number; <sup>c</sup>Representative species = bacterial species identifier.

## **Man's best friend?**

### **The effect of pet ownership on house-dust microbial communities.**

#### **Online Repository**

<sup>1</sup>Fujimura, Kei E., Ph.D., <sup>2</sup>Johnson, Christine C. Ph.D., <sup>3</sup>Ownby, Dennis R., M.D., <sup>1</sup>Cox, Michael J., Ph.D., <sup>4</sup>Brodie, Eoin L., Ph.D., <sup>2</sup>Havstad, Suzanne L., M.A., <sup>5</sup>Zoratti, Edward M., M.D., <sup>2</sup>Woodcroft, Kimberley J., Ph.D., <sup>2</sup>Bobbitt, Kevin R., Ph.D., <sup>2</sup>Wegienka, Ganesa, Ph.D., <sup>6</sup>Boushey, Homer A., M.D., <sup>1\*</sup>Lynch, Susan V., Ph.D.

Division of <sup>1</sup>Gastroenterology, <sup>6</sup>Pulmonary and Critical Care, Department of Medicine, University of California, San Francisco, 513 Parnassus Ave., San Francisco, CA 94143; <sup>2</sup> Department of Biostatistics and Research Epidemiology, <sup>5</sup>Department of Internal Medicine, Division of Allergy and Immunology 1 Ford Place, Detroit Michigan 48202-3450; <sup>3</sup>Department of Pediatrics, Division of Allergy-Immunology, BG 1019, 1120 15th Street, Augusta, GA 30912-3790; <sup>4</sup>Center for Environmental Biotechnology, Lawrence Berkeley National Laboratory, Berkeley, CA.

Corresponding author: Susan Lynch, Ph.D., Tel. +415 4766784; Fax, +4154768841; Email: [susan.lynch@ucsf.edu](mailto:susan.lynch@ucsf.edu)

**Table E3. Bacterial taxa detected in significantly higher abundance in Group 1 vs. Group 2**

| <i>Phylum</i>  | <i>S-F</i> <sup>a</sup> | <i>Taxon ID</i> <sup>b</sup> | <i>Representative species</i> <sup>c</sup>                                                                            | <i>p-value</i> | <i>q-value</i> |
|----------------|-------------------------|------------------------------|-----------------------------------------------------------------------------------------------------------------------|----------------|----------------|
| Proteobacteria | sf_3                    | 9044                         | hydrothermal sediment clone AF420370                                                                                  | 2.30E-05       | 0.0114236      |
| Proteobacteria | sf_1                    | 8553                         | <i>Pseudomonas fulva</i> str. IAM 1587                                                                                | 3.20E-05       | 0.0114236      |
| Proteobacteria | sf_1                    | 7892                         | <i>Methylophilus leisingeri</i> str. DSM 6813                                                                         | 6.84E-05       | 0.0114236      |
| Proteobacteria | sf_1                    | 8513                         | <i>Pseudomonas monteilii</i> str. CIP 104883<br>wetland ecosystem constructed to remediate mine drainage isolate str. | 8.64E-05       | 0.0114236      |
| Proteobacteria | sf_3                    | 9332                         | WJ2 WJ2                                                                                                               | 8.66E-05       | 0.0114236      |
| Proteobacteria | sf_1                    | 7817                         | TCE-contaminated site clone ccs265                                                                                    | 9.58E-05       | 0.0114236      |
| Proteobacteria | sf_1                    | 9052                         |                                                                                                                       | 0.000102978    | 0.0114236      |
| Proteobacteria | sf_1                    | 9243                         | <i>Pseudomonas tolaasii</i> str. LMG 2342T ()                                                                         | 0.000122719    | 0.01191188     |
| Proteobacteria | sf_1                    | 7390                         | <i>Afipia genosp.</i> 10 str. G8996                                                                                   | 0.000151696    | 0.01308847     |
| Proteobacteria | sf_1                    | 9219                         | <i>Pseudomonas</i> cf. <i>monteilii</i> 9                                                                             | 0.000223641    | 0.01478585     |
| Proteobacteria | sf_1                    | 8697                         | <i>Thiococcus</i> sp. AT2204                                                                                          | 0.000280521    | 0.01478585     |
| Proteobacteria | sf_1                    | 8140                         | <i>Schlegelella</i> sp. str. KB1a                                                                                     | 0.000295271    | 0.01478585     |
| Proteobacteria | sf_1                    | 8708                         |                                                                                                                       | 0.000321705    | 0.01478585     |
| Proteobacteria | sf_1                    | 8561                         | <i>Pseudomonas</i> sp. B65                                                                                            | 0.00033454     | 0.01478585     |
| Proteobacteria | sf_1                    | 9221                         | <i>Pseudomonas fulgida</i> str. DSM 14938 = LMG 2146 P 515/12                                                         | 0.000359384    | 0.01478585     |
| Proteobacteria | sf_1                    | 10407                        | hydrothermal sediment clone AF420342                                                                                  | 0.000378004    | 0.01478585     |
| Proteobacteria | sf_3                    | 10444                        | <i>Helicobacter suncus</i> str. Kaz-2                                                                                 | 0.000387748    | 0.01478585     |
| Proteobacteria | sf_1                    | 8209                         | uranium mining waste pile clone JG37-AG-122 proteobacterium                                                           | 0.000395645    | 0.01478585     |
| Proteobacteria | sf_3                    | 10397                        | groundwater clone 1006                                                                                                | 0.00039895     | 0.01478585     |
| Proteobacteria | sf_1                    | 8338                         | <i>Pseudomonas synxantha</i> str. DSM 13080 G                                                                         | 0.000423269    | 0.01478585     |
| Proteobacteria | sf_3                    | 9735                         | uranium mining waste pile clone JG37-AG-15 proteobacterium                                                            | 0.000440574    | 0.01478585     |
| Proteobacteria | sf_3                    | 10523                        | <i>Riftia pachyptila</i> 's tube clone R103-B70                                                                       | 0.000458299    | 0.01478585     |
| Proteobacteria | sf_1                    | 9493                         | <i>Pseudomonas</i> sp. str. dcm7B                                                                                     | 0.000458852    | 0.01478585     |
| Proteobacteria | sf_1                    | 8433                         | <i>Pseudomonas syringae</i> pv. <i>broussonetiae</i> str. KOZ 8101 pv.                                                | 0.000480885    | 0.01478585     |
| Actinobacteria | sf_1                    | 2018                         | <i>Curtobacterium herbarum</i> str. P 420/07                                                                          | 0.000485694    | 0.01478585     |
| Proteobacteria | sf_1                    | 8813                         | <i>Lyrodus pedicellatus</i> symbiont                                                                                  | 0.000495063    | 0.01478585     |
| Proteobacteria | sf_1                    | 7871                         |                                                                                                                       | 0.000552475    | 0.01489686     |
| Proteobacteria | sf_1                    | 8263                         |                                                                                                                       | 0.00055849     | 0.01489686     |

|                  |       |       |                                                                                                                                                                                                                                            |             |            |
|------------------|-------|-------|--------------------------------------------------------------------------------------------------------------------------------------------------------------------------------------------------------------------------------------------|-------------|------------|
| Proteobacteria   | sf_1  | 8578  | <i>Marinobacter lipolyticus</i> str. SM-19                                                                                                                                                                                                 | 0.000600307 | 0.01489686 |
| Proteobacteria   | sf_1  | 9446  | <i>Halomonas</i> sp. str. IB-I6                                                                                                                                                                                                            | 0.000614844 | 0.01489686 |
| Proteobacteria   | sf_1  | 9267  | <i>Pseudomonas syringae</i> pv. theae str. PT1                                                                                                                                                                                             | 0.000627379 | 0.01489686 |
| Proteobacteria   | sf_1  | 9028  | <i>Pseudomonas koreensis</i> str. Ps 9-14                                                                                                                                                                                                  | 0.000628216 | 0.01489686 |
| Synergistes      | sf_3  | 719   | <i>Synergistes</i> sp. P1 str. P4G_18                                                                                                                                                                                                      | 0.000640356 | 0.01489686 |
| Proteobacteria   | sf_1  | 6799  | <i>Rhodopseudomonas palustris</i> str. ATCC 17001                                                                                                                                                                                          | 0.000652251 | 0.01489686 |
| Proteobacteria   | sf_1  | 6768  | <i>Rhodopseudomonas palustris</i> str. GH                                                                                                                                                                                                  | 0.000682337 | 0.01513873 |
| Proteobacteria   | sf_1  | 8723  | <i>Vibrio calviensis</i> str. RE35F/12                                                                                                                                                                                                     | 0.000724233 | 0.01538183 |
| Synergistes      | sf_3  | 60    | <i>Flexistipes</i> sp. str. E3_33                                                                                                                                                                                                          | 0.000732911 | 0.01538183 |
|                  |       |       | Arctic deep sea Isolation common chemoorganotrophic oxygen-respiring polar current d 1210 (50 m above sediment Hakon Mosby Mud Vulcano (HMMV 72N 14E)) via serial dilution series applying 2 g/l yeast or meat extract artificial seawater |             |            |
| Proteobacteria   | sf_1  | 9294  |                                                                                                                                                                                                                                            | 0.000792741 | 0.01619968 |
| Proteobacteria   | sf_1  | 9175  | <i>Pseudomonas extremorientalis</i> str. KMM3447                                                                                                                                                                                           | 0.00082506  | 0.0163176  |
| Proteobacteria   | sf_1  | 8687  | <i>Pseudomonas putida</i> str. ATCC 17472 <sup>d</sup>                                                                                                                                                                                     | 0.000840538 | 0.0163176  |
| Proteobacteria   | sf_3  | 9277  | penguin droppings sediment clone KD8-68                                                                                                                                                                                                    | 0.000878008 | 0.01662927 |
| Proteobacteria   | sf_3  | 10428 | <i>Flexispira rappini</i> FH 9702248 uranium mining waste pile near Johanngeorgenstadt soil clone JG37-                                                                                                                                    | 0.00091954  | 0.01700123 |
| Gemmatimonadetes | sf_5  | 1127  | AG-21                                                                                                                                                                                                                                      | 0.000967447 | 0.01711058 |
| Proteobacteria   | sf_1  | 8853  | <i>Pseudomonas cichorii</i> str. ATCC 10857T                                                                                                                                                                                               | 0.00097848  | 0.01711058 |
| Proteobacteria   | sf_3  | 8714  | <i>Marinobacter hydrocarbonoclasticus</i> str. ATCC 27132T                                                                                                                                                                                 | 0.001009519 | 0.01711058 |
| Proteobacteria   | sf_1  | 8957  | marine clone Arctic97C-5                                                                                                                                                                                                                   | 0.001013593 | 0.01711058 |
| Proteobacteria   | sf_1  | 7087  | <i>Bradyrhizobium japonicum</i> HA1                                                                                                                                                                                                        | 0.001056936 | 0.01733955 |
| Proteobacteria   | sf_1  | 8288  |                                                                                                                                                                                                                                            | 0.001114327 | 0.01733955 |
| Proteobacteria   | sf_1  | 8546  | <i>Thiocapsa litoralis</i>                                                                                                                                                                                                                 | 0.001127095 | 0.01733955 |
| Proteobacteria   | sf_1  | 7982  | marine? clone KD1-99                                                                                                                                                                                                                       | 0.001129272 | 0.01733955 |
| Proteobacteria   | sf_1  | 9141  | <i>Halomonas</i> sp. SK1                                                                                                                                                                                                                   | 0.00115496  | 0.01733955 |
| Actinobacteria   | sf_1  | 1544  | <i>Kitasatospora cystarginea</i> str. IFO14836T                                                                                                                                                                                            | 0.00119345  | 0.01733955 |
| Bacteroidetes    | sf_19 | 5366  | <i>Flexibacter roseolus</i> str. IFO 16030                                                                                                                                                                                                 | 0.00125056  | 0.01733955 |
| Proteobacteria   | sf_3  | 8321  | Wadden Sea sediment clone Dangast A9                                                                                                                                                                                                       | 0.001253997 | 0.01733955 |
| Proteobacteria   | sf_1  | 10248 | <i>Desulfovibrio giganteus</i> str. DSM 4370                                                                                                                                                                                               | 0.001317424 | 0.01733955 |
| Proteobacteria   | sf_3  | 10562 | <i>Helicobacter rappini</i> W.Tee-Yu                                                                                                                                                                                                       | 0.001321901 | 0.01733955 |
| Proteobacteria   | sf_1  | 7316  |                                                                                                                                                                                                                                            | 0.00136099  | 0.01733955 |

|                  |        |       |                                                        |             |            |
|------------------|--------|-------|--------------------------------------------------------|-------------|------------|
| Proteobacteria   | sf_1   | 7333  | <i>Afipia genosp.</i> 4 str. G3644                     | 0.00136099  | 0.01733955 |
| Proteobacteria   | sf_1   | 8012  | <i>Acidovorax konjaci</i> str. DSM 7481                | 0.001387645 | 0.01733955 |
| Proteobacteria   | sf_1   | 7782  | <i>Burkholderia hospita</i> str. LMG 20598T            | 0.001394009 | 0.01733955 |
| Proteobacteria   | sf_1   | 6917  | <i>Bradyrhizobium japonicum</i> str. IAM 12608         | 0.001412753 | 0.01733955 |
| Firmicutes       | sf_12  | 4415  | termite gut homogenate clone Rs-K32 bacterium          | 0.001424065 | 0.01733955 |
| Proteobacteria   | sf_3   | 8477  | marine sediment clone Limfjorden L8                    | 0.001427925 | 0.01733955 |
| Bacteroidetes    | sf_1   | 5991  | <i>Tenacibaculum ovolyticum</i> str. IAM14318          | 0.001446612 | 0.01733955 |
| Proteobacteria   | sf_1   | 7705  | penguin droppings sediments clone KD4-7                | 0.001472363 | 0.01733955 |
| Proteobacteria   | sf_3   | 9270  | <i>Stenotrophomonas rhizophila</i> str. e-p10          | 0.001493223 | 0.01733955 |
| Proteobacteria   | sf_1   | 6887  | <i>Bradyrhizobium</i> str. YB2                         | 0.001532529 | 0.01733955 |
| Actinobacteria   | sf_3   | 2045  | hypersaline lake clone ML602J-44                       | 0.001572554 | 0.01733955 |
| Proteobacteria   | sf_3   | 10442 | <i>Helicobacter cetorum</i> str. MIT 99-5656           | 0.001576091 | 0.01733955 |
| Proteobacteria   | sf_1   | 7398  | <i>Bradyrhizobium japonicum</i> str. USDA 38           | 0.001593938 | 0.01733955 |
| Proteobacteria   | sf_1   | 8136  | <i>Acanthamoeba</i> sp. UWC6 symbiont                  | 0.001606682 | 0.01733955 |
| Bacteroidetes    | sf_1   | 5473  |                                                        | 0.001627847 | 0.01733955 |
| Acidobacteria    | sf_1   | 572   | forested wetland clone FW144                           | 0.001712876 | 0.01733955 |
| Proteobacteria   | sf_1   | 7319  | <i>Anabaena circinalis</i> AWQC118C isolate str. UNSW1 | 0.001720231 | 0.01733955 |
| Unclassified     | sf_140 | 6355  |                                                        | 0.001759842 | 0.01733955 |
| Proteobacteria   | sf_1   | 6959  | <i>Rhodocista pekingensis</i> str. 3-p                 | 0.001762273 | 0.01733955 |
| Proteobacteria   | sf_3   | 8874  | hydrothermal sediment clone AF420367                   | 0.001762766 | 0.01733955 |
| Proteobacteria   | sf_1   | 7720  | penguin droppings sediments clone KD1-79               | 0.001763131 | 0.01733955 |
| Gemmatimonadetes | sf_5   | 10112 | forest soil clone NOS7.157WL                           | 0.001778436 | 0.01733955 |
| Proteobacteria   | sf_8   | 9558  |                                                        | 0.00181305  | 0.01733955 |
| Proteobacteria   | sf_1   | 9182  | <i>Methylobacter marinus</i> str. A45                  | 0.001821519 | 0.01733955 |
| Proteobacteria   | sf_1   | 9172  | <i>Pseudomonas psychrophila</i> str. E-3               | 0.00183102  | 0.01733955 |
| Proteobacteria   | sf_1   | 7768  | swine intestine clone p-861-a5                         | 0.001868532 | 0.0174816  |
| Proteobacteria   | sf_1   | 7403  | <i>Oligotropha carboxidovorans</i> str. S23            | 0.001894307 | 0.01751176 |
| Proteobacteria   | sf_1   | 6867  | heavy metal-contaminated soil clone a13131             | 0.002058109 | 0.01880218 |
| Proteobacteria   | sf_6   | 7252  | bacterioplankton clone AEGEAN_108                      | 0.002101981 | 0.01884486 |
| Proteobacteria   | sf_3   | 8230  |                                                        | 0.002111317 | 0.01884486 |
| Proteobacteria   | sf_1   | 9469  | cf. <i>Pseudomonas</i> sp. clone Llangefni 52          | 0.002211911 | 0.01940181 |
| Proteobacteria   | sf_3   | 9167  | pea aphid symbiont clone APe4_38                       | 0.002245827 | 0.01940181 |
| Proteobacteria   | sf_3   | 10456 | <i>Campylobacter showae</i>                            | 0.002275645 | 0.01940181 |



|                |      |       |                                                                    |             |            |
|----------------|------|-------|--------------------------------------------------------------------|-------------|------------|
| Proteobacteria | sf_3 | 8577  | <i>Xanthomonas axonopodis</i> pv. citri str. MA                    | 0.002286618 | 0.01940181 |
| Proteobacteria | sf_1 | 6927  | <i>Nitrobacter hamburgensis</i> str. X14                           | 0.002298642 | 0.01940181 |
| Proteobacteria | sf_1 | 10244 |                                                                    | 0.002350172 | 0.01962345 |
| Proteobacteria | sf_3 | 8349  | Norway:(Svalbard)Hornsund clone Sva0864                            | 0.002403202 | 0.01964942 |
| TM6            | sf_1 | 9803  | forest soil clone S1204                                            | 0.002428388 | 0.01964942 |
| Proteobacteria | sf_1 | 6941  | <i>Rhodopseudomonas rhenobacensis</i> str. Klemme Rb               | 0.002453911 | 0.01964942 |
| Proteobacteria | sf_3 | 10448 | <i>Helicobacter felis</i> str. Dog-1                               | 0.002454498 | 0.01964942 |
|                |      |       | hydrothermal vent 9 degrees North East Rise Pacific Ocean clone    |             |            |
| Proteobacteria | sf_1 | 10427 | CH3_17_BAC_16SrRNA_9N_EPR                                          | 0.002519605 | 0.01996481 |
| Nitrospira     | sf_2 | 697   | forested wetland clone FW118                                       | 0.002585947 | 0.02028351 |
| Proteobacteria | sf_3 | 10436 | <i>Helicobacter aurati</i> str. MIT 97-5075c                       | 0.002633955 | 0.02045347 |
| Proteobacteria | sf_1 | 6922  | <i>Dechlorospirillum</i> sp. str. SN1                              | 0.00268269  | 0.02062566 |
| Proteobacteria | sf_1 | 6878  | <i>Bradyrhizobium japonicum</i> SD5                                | 0.002734541 | 0.02070931 |
| Proteobacteria | sf_1 | 6732  | <i>Anabaena circinalis</i> AWQC118C isolate str. UNSW7             | 0.002754673 | 0.02070931 |
| Proteobacteria | sf_1 | 10332 | Psychrophilic sulfate-reducing isolate str. LSv23 bacterium        | 0.002777805 | 0.02070931 |
| Proteobacteria | sf_3 | 10430 | <i>Helicobacter heilmannii</i> str. MM2                            | 0.002800246 | 0.02070931 |
| Proteobacteria | sf_3 | 8741  | marine sediment clone Limfjorden L10                               | 0.002842241 | 0.02078562 |
| Proteobacteria | sf_3 | 9584  |                                                                    | 0.003012041 | 0.02078562 |
|                |      |       | soil sample uranium mining waste pile near town Johanngeorgenstadt |             |            |
| Acidobacteria  | sf_6 | 6345  | clone JG36-TzT-77 bacterium                                        | 0.003018016 | 0.02078562 |
| Proteobacteria | sf_1 | 7902  | <i>Alcaligenes faecalis</i> str. M3A                               | 0.003026214 | 0.02078562 |
| Acidobacteria  | sf_6 | 6359  | PCE-contaminated site clone CLi114                                 | 0.003027789 | 0.02078562 |
| Proteobacteria | sf_3 | 10050 | DCP-dechlorinating consortium clone SHA-51                         | 0.003079084 | 0.02078562 |
| Proteobacteria | sf_3 | 10385 |                                                                    | 0.003108651 | 0.02078562 |
| Proteobacteria | sf_3 | 10451 | <i>Helicobacter heilmannii</i> str. C4S                            | 0.003108651 | 0.02078562 |
|                |      |       | Antarctic pack ice Lasarev Sea Southern Ocean clone ANTXI/4_14-    |             |            |
| Proteobacteria | sf_1 | 9230  | 62 sea                                                             | 0.003126135 | 0.02078562 |
| Actinobacteria | sf_1 | 1513  | <i>Microbacterium gubbeenense</i> str. DPC 5284                    | 0.003131395 | 0.02078562 |
| Proteobacteria | sf_3 | 10540 | <i>Campylobacter showae</i> str. LMG 12636                         | 0.003147308 | 0.02078562 |
| Actinobacteria | sf_1 | 1771  | <i>Streptomyces setonii</i> str. ATCC25497                         | 0.003151965 | 0.02078562 |
| Proteobacteria | sf_3 | 8327  | Arctic sea ice ARK10148                                            | 0.003158539 | 0.02078562 |
| Proteobacteria | sf_1 | 9239  | Arctic sea ice ARK10228                                            | 0.003277816 | 0.02115563 |
| Proteobacteria | sf_1 | 9300  | <i>Lyrodus pedicellatus</i> symbiont                               | 0.003294756 | 0.02115563 |

|                |       |       |                                                                                                            |             |            |
|----------------|-------|-------|------------------------------------------------------------------------------------------------------------|-------------|------------|
| Cyanobacteria  | sf_8  | 5206  |                                                                                                            | 0.003312486 | 0.02115563 |
| Proteobacteria | sf_1  | 8564  | <i>Rahnella aquatilis</i> str. ATCC 33989                                                                  | 0.003323739 | 0.02115563 |
| Proteobacteria | sf_1  | 7135  | <i>Rhizobium gallicum</i> str. FL27                                                                        | 0.003381379 | 0.0212033  |
| Proteobacteria | sf_1  | 9224  | <i>Acidithiobacillus albertensis</i> str. DSM 14366                                                        | 0.003393428 | 0.0212033  |
| Proteobacteria | sf_3  | 10534 | <i>Helicobacter pylori</i>                                                                                 | 0.003413144 | 0.0212033  |
| Proteobacteria | sf_5  | 10239 |                                                                                                            | 0.003490004 | 0.0215087  |
| Proteobacteria | sf_1  | 7539  | <i>Rhodocista</i> sp. AR2107                                                                               | 0.00355369  | 0.02172874 |
| Proteobacteria | sf_3  | 6908  | <i>Rhinocyllus conicus</i> endosymbiont                                                                    | 0.003598215 | 0.0218291  |
| Proteobacteria | sf_1  | 6981  | <i>Ochrobactrum gallinifaecis</i> str. Iso 196                                                             | 0.003651522 | 0.02198077 |
| Proteobacteria | sf_1  | 6871  | <i>Rhizobium mongolense</i> str. USDA 1832                                                                 | 0.003728244 | 0.02217303 |
| Proteobacteria | sf_3  | 10463 | <i>Campylobacter</i> subsp. fetus                                                                          | 0.003747718 | 0.02217303 |
| Proteobacteria | sf_1  | 7497  | <i>Pseudaminobacter salicylatoxidans</i> str. KTC001                                                       | 0.003769122 | 0.02217303 |
| Proteobacteria | sf_1  | 8725  | <i>Pseudomonas</i> sp. str. 2N1-1                                                                          | 0.003842237 | 0.02218252 |
| Bacteroidetes  | sf_1  | 5758  | <i>Tenacibaculum</i> sp. str. MGP-10                                                                       | 0.003867949 | 0.02218252 |
| Proteobacteria | sf_1  | 6804  | <i>Rhizobium</i> sp. str. SH19312                                                                          | 0.003905162 | 0.02218252 |
| Proteobacteria | sf_3  | 10548 | <i>Helicobacter rappini</i> W.Tee-Bat<br>ground water deep-well injection disposal site radioactive wastes | 0.003906924 | 0.02218252 |
| Proteobacteria | sf_1  | 8474  | Tomsk-7 clone S15A-MN7 proteobacterium                                                                     | 0.003913566 | 0.02218252 |
| Proteobacteria | sf_3  | 10484 | <i>Campylobacter helveticus</i>                                                                            | 0.003968936 | 0.02233335 |
| Proteobacteria | sf_1  | 8601  | <i>Pseudomonas marginalis</i> str. ATCC 10844T                                                             | 0.004041503 | 0.02242878 |
| Actinobacteria | sf_1  | 1294  |                                                                                                            | 0.004043664 | 0.02242878 |
| Proteobacteria | sf_1  | 8508  | <i>Pseudomonas citronellolis</i> str. TERIDB26                                                             | 0.004102135 | 0.0224338  |
| Firmicutes     | sf_12 | 4637  | termite gut clone Rs-088                                                                                   | 0.004112177 | 0.0224338  |
| Proteobacteria | sf_1  | 7381  | <i>Aminobacter aminovorans</i> str. DSM7048T                                                               | 0.004131236 | 0.0224338  |
| Chloroflexi    | sf_1  | 583   | anaerobic bioreactor clone SHD-238                                                                         | 0.004199961 | 0.02253068 |
| Proteobacteria | sf_1  | 6798  | <i>Agrobacterium tumefaciens</i> TG14                                                                      | 0.004260194 | 0.02253068 |
| Proteobacteria | sf_1  | 7995  | <i>Ottowia thiooxydans</i> str. K11                                                                        | 0.004263479 | 0.02253068 |
| Proteobacteria | sf_1  | 8037  | <i>Chitinimonas taiwanensis</i> str. cf                                                                    | 0.004265136 | 0.02253068 |
| Proteobacteria | sf_1  | 8336  | <i>Alteromonas</i> sp. str. MS23                                                                           | 0.004308208 | 0.02255022 |
| Actinobacteria | sf_1  | 1558  | <i>Corynebacterium</i> sp. str. 61722                                                                      | 0.004326915 | 0.02255022 |
| Proteobacteria | sf_1  | 6964  | <i>Agrobacterium tumefaciens</i> str. C58 Cereon                                                           | 0.004447959 | 0.02282787 |
| Proteobacteria | sf_23 | 10443 | <i>Helicobacter pylori</i> str. 85D08                                                                      | 0.004468381 | 0.02282787 |
| Proteobacteria | sf_3  | 10576 | <i>Helicobacter</i> sp. 'liver 3' str. liver 3                                                             | 0.004468381 | 0.02282787 |

|                 |       |       |                                                                                                            |             |            |
|-----------------|-------|-------|------------------------------------------------------------------------------------------------------------|-------------|------------|
| Proteobacteria  | sf_4  | 7157  | acid mine drainage clone ASL45                                                                             | 0.004550428 | 0.02300867 |
| Proteobacteria  | sf_1  | 6789  | <i>Shinella zoogloeoides</i> str. ATCC 19623                                                               | 0.004603607 | 0.02300867 |
| Actinobacteria  | sf_1  | 1111  | <i>Kitasatospora setae</i> str. KM-6054 <sup>d</sup><br>marine sediment above hydrate ridge clone Hyd24-01 | 0.004611849 | 0.02300867 |
| Proteobacteria  | sf_1  | 9438  | proteobacterium                                                                                            | 0.004632794 | 0.02300867 |
| Proteobacteria  | sf_1  | 8211  | <i>Colwellia maris</i> str. ABE-1                                                                          | 0.004667326 | 0.02300867 |
| Proteobacteria  | sf_1  | 9005  | <i>Pseudomonas</i> sp. str. KY                                                                             | 0.004681551 | 0.02300867 |
| Firmicutes      | sf_17 | 2683  |                                                                                                            | 0.004726423 | 0.0230831  |
| Proteobacteria  | sf_1  | 6869  | <i>Azospirillum</i> sp. str. Mat2-1a                                                                       | 0.00476124  | 0.02310781 |
| Proteobacteria  | sf_3  | 9286  | <i>Stenotrophomonas maltophilia</i> str. LMG 11104 <sup>d</sup>                                            | 0.004844135 | 0.02335979 |
| Proteobacteria  | sf_1  | 7334  | <i>Agrobacterium tumefaciens</i> C4                                                                        | 0.004882342 | 0.02335979 |
| Proteobacteria  | sf_3  | 10572 | <i>Helicobacter</i> sp                                                                                     | 0.004916687 | 0.02335979 |
| Proteobacteria  | sf_1  | 6673  | <i>Nitratireductor aquibiodomus</i> str. NL21                                                              | 0.004958027 | 0.02335979 |
| Proteobacteria  | sf_1  | 7568  | <i>Rhizobium etli</i> str. USDA 2667 ATCC 14483 SEMIA 043                                                  | 0.00496357  | 0.02335979 |
| Spirochaetes    | sf_1  | 6460  | termite gut homogenate clone Rs-B69 sp.                                                                    | 0.005009598 | 0.02337854 |
| Proteobacteria  | sf_1  | 6636  | <i>Bradyrhizobium elkanii</i> str. USDA 76                                                                 | 0.005074693 | 0.02337854 |
| Proteobacteria  | sf_1  | 7522  | <i>Bradyrhizobium</i> sp. str. KKI14                                                                       | 0.005074693 | 0.02337854 |
| Planctomycetes  | sf_3  | 4652  | anoxic basin clone CY0ARA028C04                                                                            | 0.005123257 | 0.02337854 |
| Proteobacteria  | sf_1  | 7392  |                                                                                                            | 0.005124577 | 0.02337854 |
| Bacteroidetes   | sf_1  | 5492  | <i>Sphingobacterium</i> sp. str. HC-6155                                                                   | 0.005166728 | 0.02337854 |
| Deferribacteres | sf_1  | 797   | <i>Deferribacter abyssi</i> str. DR                                                                        | 0.005178298 | 0.02337854 |
| Proteobacteria  | sf_1  | 10016 | termite gut homogenate clone Rs-N35 proteobacterium                                                        | 0.00522264  | 0.0234062  |
| Proteobacteria  | sf_3  | 10447 | <i>Sulfurospirillum deleyianum</i> str. Spirillum 5175                                                     | 0.005244709 | 0.0234062  |
| Acidobacteria   | sf_6  | 6423  | coal effluent wetland clone FW92                                                                           | 0.00529358  | 0.02348931 |
| Proteobacteria  | sf_6  | 6986  | bacterioplankton clone AEGEAN_167                                                                          | 0.005375701 | 0.02367751 |
| Bacteroidetes   | sf_1  | 5267  | bacterioplankton clone AEGEAN_179                                                                          | 0.005396977 | 0.02367751 |
| Bacteroidetes   | sf_15 | 5511  | marine sediment above hydrate ridge clone Hyd-B2-1 bacterium                                               | 0.005499922 | 0.02377873 |
| Proteobacteria  | sf_1  | 7747  |                                                                                                            | 0.005508831 | 0.02377873 |
| Proteobacteria  | sf_3  | 8339  | water 5 m downstream manure clone 35ds5                                                                    | 0.005525395 | 0.02377873 |
| Proteobacteria  | sf_1  | 9554  | <i>Tilapia parasite</i> TPT-541                                                                            | 0.005542537 | 0.02377873 |
| Proteobacteria  | sf_1  | 7233  |                                                                                                            | 0.005722598 | 0.02433577 |
| Actinobacteria  | sf_1  | 2048  | <i>Nocardia uniformis</i> str. DSM 43136                                                                   | 0.005735054 | 0.02433577 |
| Proteobacteria  | sf_1  | 6683  | <i>Sinorhizobium fredii</i> str. ATCC35423                                                                 | 0.005807952 | 0.02444203 |

|                |        |       |                                                                     |             |            |
|----------------|--------|-------|---------------------------------------------------------------------|-------------|------------|
| Proteobacteria | sf_1   | 7761  | <i>Ralstonia detusculanense</i> str. APF11                          | 0.005850434 | 0.02444203 |
| Proteobacteria | sf_1   | 6972  | <i>Ensifer adhaerens</i> str. LMG 20582                             | 0.005944931 | 0.02444203 |
| Proteobacteria | sf_1   | 10384 | deep-sea hydrothermal vent clone VC1.2-cl06                         | 0.006046435 | 0.02444203 |
| Proteobacteria | sf_1   | 6770  | <i>Rhizobium tropici</i> str. LMG 9517                              | 0.006050366 | 0.02444203 |
| Proteobacteria | sf_3   | 10520 | <i>Helicobacter</i> sp. blood isolate 964                           | 0.006053488 | 0.02444203 |
| Proteobacteria | sf_1   | 10497 | UASB reactor granular sludge clone PD-UASB-2 proteobacterium        | 0.006092647 | 0.02444203 |
| Bacteroidetes  | sf_1   | 5317  | <i>Tenacibaculum maritimum</i> str. IFO 15946                       | 0.006097862 | 0.02444203 |
| Proteobacteria | sf_1   | 9282  |                                                                     | 0.006115072 | 0.02444203 |
| Proteobacteria | sf_1   | 9351  | bacterioplankton clone ZA2333c                                      | 0.006145238 | 0.02444203 |
| Proteobacteria | sf_1   | 7718  | <i>Lampropedia hyalina</i> str. DSM 15336                           | 0.006281971 | 0.02444203 |
| Actinobacteria | sf_1   | 1668  | <i>Corynebacterium ulcerans</i> str. NCTC 7910                      | 0.006285961 | 0.02444203 |
| Proteobacteria | sf_1   | 7044  | <i>Afipia</i> <i>genosp.</i> 2 str. G4438                           | 0.00631418  | 0.02444203 |
| Unclassified   | sf_132 | 9820  |                                                                     | 0.006322822 | 0.02444203 |
| Proteobacteria | sf_1   | 6995  |                                                                     | 0.006341602 | 0.02444203 |
| Proteobacteria | sf_1   | 6916  | lake microbial mat isolate str. R-9219                              | 0.006357691 | 0.02444203 |
| Proteobacteria | sf_6   | 6898  | heavy metal-contaminated soil clone a13113                          | 0.006388324 | 0.02444203 |
| Proteobacteria | sf_1   | 9048  | <i>Allochromatium</i> sp. AT2202                                    | 0.006407799 | 0.02444203 |
| Proteobacteria | sf_1   | 7509  |                                                                     | 0.00641009  | 0.02444203 |
| Proteobacteria | sf_1   | 7600  | <i>Acetobacter pomorum</i> str. LTH2458                             | 0.006414788 | 0.02444203 |
| Firmicutes     | sf_5   | 3036  | termite gut homogenate clone Rs-F27 bacterium                       | 0.006452047 | 0.02444203 |
| Proteobacteria | sf_1   | 7641  | <i>Hyphomicrobium facile</i> str. H-526                             | 0.006480594 | 0.02444203 |
| Proteobacteria | sf_1   | 7467  | <i>Azospirillum</i> sp. str. ASP-1                                  | 0.00648404  | 0.02444203 |
| Proteobacteria | sf_1   | 6966  | <i>Mesorhizobium tianshanense</i> str. -1BS; USDA 3592              | 0.006562086 | 0.02452944 |
| Firmicutes     | sf_1   | 4044  |                                                                     | 0.006570407 | 0.02452944 |
| Proteobacteria | sf_3   | 9483  |                                                                     | 0.006605095 | 0.02454096 |
| Proteobacteria | sf_5   | 9821  |                                                                     | 0.006639166 | 0.02455008 |
| Proteobacteria | sf_1   | 8131  |                                                                     | 0.006827414 | 0.02488471 |
| Proteobacteria | sf_1   | 7051  | <i>Mycoplana dimorpha</i> str. IAM 13154                            | 0.00686309  | 0.02488471 |
|                |        |       | Arctic pack ice; northern Fram Strait; 80 31.1 N; 01 deg 59.7 min E |             |            |
| Proteobacteria | sf_3   | 9473  | clone ARKDMS-58                                                     | 0.006875842 | 0.02488471 |
| Proteobacteria | sf_1   | 10097 | inactive deep-sea hydrothermal vent chimneys clone IndB2-42         | 0.006944132 | 0.02488471 |
| Proteobacteria | sf_1   | 8320  | acid mine drainage clone BA11                                       | 0.00696593  | 0.02488471 |
| Proteobacteria | sf_1   | 8202  |                                                                     | 0.00697489  | 0.02488471 |

|                |       |       |                                                                                                              |             |            |
|----------------|-------|-------|--------------------------------------------------------------------------------------------------------------|-------------|------------|
| Actinobacteria | sf_1  | 1839  | <i>Kribbella solani</i> str. DSA1                                                                            | 0.007017727 | 0.02488471 |
| Proteobacteria | sf_3  | 9321  | marine sediment clone Tokyo Bay D                                                                            | 0.007020095 | 0.02488471 |
| Bacteroidetes  | sf_1  | 6269  | acidic forest soil clone UC1                                                                                 | 0.007110014 | 0.02488471 |
| Firmicutes     | sf_12 | 3019  | <i>Tepidibacter formicigenes</i> str. DV1184                                                                 | 0.007146135 | 0.02488471 |
| Proteobacteria | sf_1  | 8552  | <i>Acidithiobacillus ferrooxidans</i> str. D2                                                                | 0.007148079 | 0.02488471 |
| Proteobacteria | sf_1  | 8068  | <i>Burkholderia caryophylli</i> str. ATCC 25418                                                              | 0.007171416 | 0.02488471 |
| Proteobacteria | sf_1  | 8283  | <i>Heteropsylla texana</i> symbiont                                                                          | 0.007263198 | 0.02488471 |
| Actinobacteria | sf_1  | 1567  |                                                                                                              | 0.007324653 | 0.02488471 |
| Proteobacteria | sf_1  | 7041  | <i>Rhizobium huautlense</i> str. SO2 ()                                                                      | 0.007334955 | 0.02488471 |
| Spirochaetes   | sf_1  | 6491  | termite gut homogenate clone BCf8-03                                                                         | 0.00734572  | 0.02488471 |
| Actinobacteria | sf_3  | 1130  | <i>Georgenia muralis</i> str. 1A-C                                                                           | 0.00735748  | 0.02488471 |
| Proteobacteria | sf_1  | 7139  | <i>Mesorhizobium loti</i> str. R8CS USDA 3467<br>Mono Lake at depth 23 m station 6 July 2000 clone ML623J-57 | 0.00735907  | 0.02488471 |
| Proteobacteria | sf_1  | 10187 | proteobacterium                                                                                              | 0.007405174 | 0.02488471 |
| Proteobacteria | sf_1  | 8747  | uranium waste soil clone JG30-KF-CM35                                                                        | 0.007408697 | 0.02488471 |
| Proteobacteria | sf_3  | 9105  |                                                                                                              | 0.007408902 | 0.02488471 |
| Proteobacteria | sf_1  | 8009  | denitrifying reactor clone 81<br>ground water deep-well injection disposal site radioactive wastes           | 0.007434673 | 0.02488471 |
| Proteobacteria | sf_1  | 7126  | Tomsk-7 clone S15A-MN96 proteobacterium                                                                      | 0.00749277  | 0.02493521 |
| Proteobacteria | sf_1  | 8641  | <i>Moritella abyssi</i> str. 2693                                                                            | 0.007513981 | 0.02493521 |
| Proteobacteria | sf_1  | 10489 | S17sBac16 complete clone                                                                                     | 0.007600108 | 0.0251137  |
| Proteobacteria | sf_3  | 10464 | <i>Campylobacter</i> sp. str. NO2B                                                                           | 0.007767836 | 0.0254769  |
| Proteobacteria | sf_1  | 7907  | <i>Thauera aromatica</i> str. LG356                                                                          | 0.007775642 | 0.0254769  |
| Bacteroidetes  | sf_15 | 6046  | chlorobenzene-degrading consortium clone IIIB-1                                                              | 0.007846844 | 0.02560217 |
| Proteobacteria | sf_4  | 9884  | forested wetland clone RCP2-62                                                                               | 0.00794414  | 0.02563411 |
| Proteobacteria | sf_1  | 8201  | <i>Shewanella surugaensis</i> str. c959                                                                      | 0.007944244 | 0.02563411 |
| Firmicutes     | sf_12 | 2915  | <i>Tepidibacter thalassicus</i> str. SC 562                                                                  | 0.007955667 | 0.02563411 |
| Proteobacteria | sf_1  | 8011  | <i>Burkholderia graminis</i> str. AUS35                                                                      | 0.008177084 | 0.02580294 |
| Proteobacteria | sf_3  | 10507 | termite gut homogenate clone Rs-M59 proteobacterium                                                          | 0.008184612 | 0.02580294 |
| Proteobacteria | sf_1  | 6692  | <i>Phyllobacterium trifolii</i> str. PETP02                                                                  | 0.008197356 | 0.02580294 |
| Proteobacteria | sf_1  | 7929  | hydrothermal vent clone VC2.1 Bac29                                                                          | 0.008225679 | 0.02580294 |
| Spirochaetes   | sf_1  | 6565  | termite gut clone NkS-Oxy25                                                                                  | 0.008247427 | 0.02580294 |
| Proteobacteria | sf_4  | 8855  |                                                                                                              | 0.008269412 | 0.02580294 |

|                |       |       |                                                                                     |             |            |
|----------------|-------|-------|-------------------------------------------------------------------------------------|-------------|------------|
| Bacteroidetes  | sf_1  | 5946  | tongue dorsa clone DO027                                                            | 0.008304323 | 0.02580294 |
| Bacteroidetes  | sf_1  | 5521  | Flavobacteriaceae str. SW269                                                        | 0.008311553 | 0.02580294 |
| Nitrospira     | sf_2  | 681   |                                                                                     | 0.008408407 | 0.02580294 |
| Actinobacteria | sf_1  | 1241  | <i>Microbacterium kitamiense</i> CV88                                               | 0.00840994  | 0.02580294 |
| Proteobacteria | sf_1  | 9864  | uranium mining waste pile clone JG37-AG-133 proteobacterium                         | 0.008458665 | 0.02580294 |
| Proteobacteria | sf_1  | 6726  |                                                                                     | 0.008463527 | 0.02580294 |
| Proteobacteria | sf_1  | 7477  | <i>Bradyrhizobium elkanii</i> str. SEMIA 6028                                       | 0.008466443 | 0.02580294 |
| Proteobacteria | sf_3  | 10518 | <i>Helicobacter pylori</i> str. ATCC 49396T                                         | 0.008473262 | 0.02580294 |
| Proteobacteria | sf_6  | 6954  |                                                                                     | 0.00857599  | 0.02597359 |
| Proteobacteria | sf_1  | 9386  | <i>Alteromonas</i> sp. str. NIBH P2M11                                              | 0.008610834 | 0.02597359 |
| Proteobacteria | sf_3  | 9900  | bioreactor clone mle1-27                                                            | 0.008629645 | 0.02597359 |
| Spirochaetes   | sf_1  | 6557  | spirochete clone ML320J-13                                                          | 0.008704728 | 0.02609842 |
| Proteobacteria | sf_3  | 8926  | inactive deep-sea hydrothermal vent chimneys clone IheB2-13                         | 0.008832028 | 0.02624189 |
| Proteobacteria | sf_1  | 6971  | <i>Thiobacillus</i> sp. str. 104                                                    | 0.008923912 | 0.02624189 |
| Proteobacteria | sf_1  | 9240  | <i>Pseudomonas fluorescens</i> str. CHA0                                            | 0.008996402 | 0.02624189 |
| Proteobacteria | sf_1  | 10262 | <i>Desulfovibrio</i> sp. str. Ac5.2                                                 | 0.008996836 | 0.02624189 |
| Proteobacteria | sf_1  | 8755  | <i>Pseudomonas</i> sp. SK-1-3-1                                                     | 0.009014411 | 0.02624189 |
| Bacteroidetes  | sf_15 | 5353  | trichloroethene-contaminated site clone FTLpost3 bacterium                          | 0.009057943 | 0.02624189 |
| Cyanobacteria  | sf_5  | 5039  | Cape Hatteras picoplankton clone OM270                                              | 0.009099153 | 0.02624189 |
| Proteobacteria | sf_1  | 9035  | <i>Microbulbifer</i> sp. str. JAMB-A94                                              | 0.009109084 | 0.02624189 |
| Proteobacteria | sf_1  | 7634  | <i>Bartonella henselae</i> str. Houston-1                                           | 0.0091277   | 0.02624189 |
| Proteobacteria | sf_4  | 7105  | Mariana trough hydrothermal vent water 0.2micro-m filterable fraction clone MT-NB25 | 0.009129833 | 0.02624189 |
| Bacteroidetes  | sf_1  | 5903  | marine bacterioplankton clone MB11E04                                               | 0.009134657 | 0.02624189 |
| Proteobacteria | sf_1  | 6821  | <i>Sphingomonas echinoides</i>                                                      | 0.009158106 | 0.02624189 |
| Actinobacteria | sf_1  | 1454  | <i>Nocardia yamanashiensis</i> str. IFM 0265                                        | 0.009230422 | 0.02626853 |
| Proteobacteria | sf_1  | 10071 | <i>Desulfovibrio desulfuricans</i>                                                  | 0.00923506  | 0.02626853 |
| Proteobacteria | sf_1  | 6974  | India: Himalayas Kaza Spiti Valley Cold Desert isolate str. Kaza-35                 | 0.009332126 | 0.02637742 |
| Actinobacteria | sf_1  | 1969  | hydrocarbon seep clone BPC090                                                       | 0.009381686 | 0.02637742 |
| Proteobacteria | sf_1  | 7987  | <i>Acidovorax</i> sp. str. OS-6                                                     | 0.0093864   | 0.02637742 |
| Proteobacteria | sf_1  | 9238  |                                                                                     | 0.009461489 | 0.02637742 |
| Proteobacteria | sf_1  | 9049  | uranium mining mill tailing clone GR-Sh2-34 GR-Sh2-34                               | 0.00947015  | 0.02637742 |

| hydrothermal vent 9 degrees North East Rise Pacific Ocean clone |        |       |                                                         |             |            |
|-----------------------------------------------------------------|--------|-------|---------------------------------------------------------|-------------|------------|
| Proteobacteria                                                  | sf_1   | 10530 | CH5_6_BAC_16SrRNA_9N_EPR                                | 0.009507547 | 0.02637742 |
| Proteobacteria                                                  | sf_1   | 9384  | <i>Moritella viscosa</i> str. NVI 88/478T               | 0.009531498 | 0.02637742 |
| Firmicutes                                                      | sf_5   | 668   | <i>Sedimentibacter</i> sp. str. BRS2                    | 0.009545086 | 0.02637742 |
| Gemmatimonadetes                                                | sf_5   | 1565  | uranium mining waste pile clone JG34-KF-418             | 0.009619234 | 0.02645881 |
| Proteobacteria                                                  | sf_1   | 8852  | <i>Pseudomonas stutzeri</i> str. KC                     | 0.009642687 | 0.02645881 |
| Bacteroidetes                                                   | sf_4   | 5703  |                                                         | 0.009914083 | 0.02710772 |
| Proteobacteria                                                  | sf_1   | 8097  | <i>Burkholderia cepacia</i>                             | 0.009976895 | 0.02718365 |
| Firmicutes                                                      | sf_5   | 3017  | termite gut homogenate clone Rs-D48 bacterium           | 0.0100523   | 0.02718365 |
| Proteobacteria                                                  | sf_15  | 6700  | <i>Porphyrobacter tepidarius</i> str. DSM 10594         | 0.01008887  | 0.02718365 |
| Proteobacteria                                                  | sf_5   | 7025  | bacterioplankton clone ZA2526c                          | 0.01010292  | 0.02718365 |
| Proteobacteria                                                  | sf_1   | 7470  | <i>Novosphingobium</i> sp. str. J30                     | 0.01011689  | 0.02718365 |
| Proteobacteria                                                  | sf_1   | 7300  | marine isolate JP57                                     | 0.01017927  | 0.02725696 |
| Proteobacteria                                                  | sf_1   | 7478  |                                                         | 0.01025966  | 0.02736726 |
| Proteobacteria                                                  | sf_3   | 7481  | <i>Wolbachia pipientis</i>                              | 0.0103391   | 0.02736726 |
| Unclassified                                                    | sf_92  | 9999  | termite gut homogenate clone Rs-J96                     | 0.01036608  | 0.02736726 |
| Proteobacteria                                                  | sf_1   | 6757  | <i>Ochrobactrum anthropi</i> str. ESC1                  | 0.0103743   | 0.02736726 |
| Unclassified                                                    | sf_160 | 4410  |                                                         | 0.01041783  | 0.02736726 |
| Firmicutes                                                      | sf_5   | 2928  | pig feces clone                                         | 0.01043192  | 0.02736726 |
| Proteobacteria                                                  | sf_1   | 9411  | <i>Shewanella waksmanii</i> str. KMM 3823               | 0.010475    | 0.02738776 |
| Proteobacteria                                                  | sf_1   | 6836  |                                                         | 0.01056649  | 0.02753424 |
| Proteobacteria                                                  | sf_1   | 7990  | isolate str. A0640                                      | 0.01066681  | 0.0277027  |
| Spirochaetes                                                    | sf_1   | 6488  | <i>Treponema primitia</i> str. ZAS-1                    | 0.01079274  | 0.02785052 |
| Proteobacteria                                                  | sf_3   | 10425 | <i>Sulfurimonas autotrophica</i> str. OK5               | 0.01080638  | 0.02785052 |
| Proteobacteria                                                  | sf_1   | 6857  | <i>Mesorhizobium mediterraneum</i> str. PECA20          | 0.01083132  | 0.02785052 |
| Proteobacteria                                                  | sf_1   | 7216  | <i>Ahrensia kielensis</i> str. IAM12618                 | 0.01086771  | 0.02785186 |
| Proteobacteria                                                  | sf_1   | 7379  | <i>Phyllobacterium myrsinacearum</i> HM35               | 0.01098101  | 0.02804964 |
| Proteobacteria                                                  | sf_3   | 9320  | Waste-gas biofilter clone BIy3                          | 0.01102908  | 0.02808007 |
| Bacteroidetes                                                   | sf_6   | 5792  | activated sludge foam clone 47                          | 0.01107385  | 0.02810192 |
| Proteobacteria                                                  | sf_1   | 6660  | <i>Azorhizobium caulinodans</i> str. ORS 571            | 0.01114088  | 0.02817993 |
| Acidobacteria                                                   | sf_14  | 105   | marine sediment above hydrate ridge clone Hyd24-44 sp.  | 0.01119293  | 0.02821967 |
| Actinobacteria                                                  | sf_1   | 1843  | uranium mining waste pile soil sample clone JG30-KF-A23 | 0.01139416  | 0.02853671 |
| Proteobacteria                                                  | sf_1   | 8484  | Alteromonadaceae isolate str. LA50                      | 0.01144982  | 0.02853671 |

|                |      |       |                                                                                                   |            |            |
|----------------|------|-------|---------------------------------------------------------------------------------------------------|------------|------------|
| Firmicutes     | sf_4 | 4325  | termite gut homogenate clone Rs-K21 bacterium                                                     | 0.01148555 | 0.02853671 |
| Proteobacteria | sf_1 | 7741  | <i>Leptothrix cholodnii</i> str. CCM 1827                                                         | 0.01149707 | 0.02853671 |
| Actinobacteria | sf_1 | 1355  | <i>Amycolatopsis mediterranei</i> str. IMSNU 20056T                                               | 0.01152914 | 0.02853671 |
| Proteobacteria | sf_1 | 7039  |                                                                                                   | 0.0115543  | 0.02853671 |
| Proteobacteria | sf_1 | 9228  | <i>Pseudomonas stutzeri</i> HY-105<br>lichen-dominated Antarctic cryptoendolithic community clone | 0.01164206 | 0.02853671 |
| Actinobacteria | sf_1 | 1695  | FBP417                                                                                            | 0.01164529 | 0.02853671 |
| Proteobacteria | sf_6 | 6665  | hydrocarbon-degrading consortium clone 4-Org2-22                                                  | 0.01165009 | 0.02853671 |
| Proteobacteria | sf_1 | 8023  | ferromanganous micronodule clone MND1                                                             | 0.01168617 | 0.02853671 |
| Firmicutes     | sf_1 | 28    | termite gut homogenate clone Rs-H81 bacterium                                                     | 0.01185918 | 0.02886841 |
| Proteobacteria | sf_6 | 6987  |                                                                                                   | 0.01199628 | 0.02892301 |
| Proteobacteria | sf_1 | 7056  | <i>Bartonella schoenbuchensis</i> str. R1                                                         | 0.01200334 | 0.02892301 |
| Proteobacteria | sf_1 | 8754  | <i>Pseudomonas</i> sp. str. P400Y-1                                                               | 0.01204112 | 0.02892301 |
| Proteobacteria | sf_1 | 8777  | <i>Pseudomonas</i> sp. str. KNA6-5                                                                | 0.01206092 | 0.02892301 |
| Proteobacteria | sf_1 | 9366  | Arctic seawater isolate str. R7366                                                                | 0.01206784 | 0.02892301 |
| Proteobacteria | sf_1 | 7735  | soil clone                                                                                        | 0.01216071 | 0.02905591 |
| Proteobacteria | sf_1 | 7394  | <i>Novosphingobium subterraneum</i> str. IFO 16086                                                | 0.01219986 | 0.02906002 |
| Actinobacteria | sf_1 | 1449  | Cellulomonadaceae str. WB13                                                                       | 0.01232506 | 0.02918082 |
| Proteobacteria | sf_1 | 7800  | sample taken upstream landfill clone BVC77 landfill                                               | 0.01232573 | 0.02918082 |
| Proteobacteria | sf_1 | 7353  | temperate estuarine mud clone HC65                                                                | 0.01238832 | 0.0292189  |
| Proteobacteria | sf_3 | 7010  | periodontal pocket clone 10B6                                                                     | 0.01245171 | 0.0292189  |
| Proteobacteria | sf_1 | 8196  |                                                                                                   | 0.01248634 | 0.0292189  |
| Proteobacteria | sf_1 | 10189 |                                                                                                   | 0.01249429 | 0.0292189  |
| Proteobacteria | sf_1 | 8335  | <i>Alcanivorax</i> sp. str. K3-3 (MBIC 4323)                                                      | 0.01253134 | 0.0292189  |
| Actinobacteria | sf_1 | 1186  | <i>Cryocolla antiquus</i> str. VKM 103PF                                                          | 0.01262616 | 0.0292189  |
| Spirochaetes   | sf_1 | 6579  | termite gut clone NkS83                                                                           | 0.01263248 | 0.0292189  |
| Actinobacteria | sf_1 | 1229  | <i>Streptacidiphilus carbonis</i> str. JL 415; DSM 41754                                          | 0.0126555  | 0.0292189  |
| Proteobacteria | sf_1 | 8172  | <i>Pseudoalteromonas</i> sp. str. Bdeep-1                                                         | 0.01268046 | 0.0292189  |
| Proteobacteria | sf_1 | 7943  | <i>Aquabacterium parvum</i> str. B6                                                               | 0.01275005 | 0.02929233 |
| Actinobacteria | sf_1 | 1183  | <i>Actinomyces europaeus</i> str. CCUG 32789A                                                     | 0.01281476 | 0.02935415 |
| Proteobacteria | sf_1 | 7143  | <i>Bosea massiliensis</i> str. 63287                                                              | 0.01288964 | 0.02943883 |
| Proteobacteria | sf_1 | 7945  | <i>Aquaspirillum serpens</i> str. IAM 13944                                                       | 0.01292937 | 0.02944298 |
| Proteobacteria | sf_1 | 7415  | <i>Bartonella quintana</i> str. Toulouse                                                          | 0.01301173 | 0.02945337 |



|                       |       |       |                                                                                                                 |            |            |
|-----------------------|-------|-------|-----------------------------------------------------------------------------------------------------------------|------------|------------|
| Proteobacteria        | sf_1  | 9571  | <i>Nitrosococcus oceanus</i>                                                                                    | 0.01301932 | 0.02945337 |
| Actinobacteria        | sf_1  | 1340  | <i>Streptomyces coelicolor</i>                                                                                  | 0.01306743 | 0.02945337 |
| Actinobacteria        | sf_1  | 1692  | Arctic sea ice ARK10030                                                                                         | 0.01308565 | 0.02945337 |
| Bacteroidetes         | sf_19 | 5667  | penguin droppings sediments clone KD6-118<br>soil sample uranium mining waste pile near town Johanngeorgenstadt | 0.01316815 | 0.0295105  |
| Acidobacteria         | sf_14 | 6405  | clone JG36-TzT-31 bacterium                                                                                     | 0.01324539 | 0.0295105  |
| Proteobacteria        | sf_1  | 8127  | <i>Zoogloea resiniphila</i> str. PIV-3A2y                                                                       | 0.01326038 | 0.0295105  |
| Actinobacteria        | sf_1  | 1676  |                                                                                                                 | 0.01326304 | 0.0295105  |
| Thermodesulfobacteria | sf_1  | 667   | <i>Geothermobacterium ferrireducens</i>                                                                         | 0.01341533 | 0.02952151 |
| Acidobacteria         | sf_1  | 516   | uranium mining waste pile clone JG34-KF-153                                                                     | 0.01341926 | 0.02952151 |
| Proteobacteria        | sf_1  | 7914  | <i>Burkholderia andropogonis</i> str. ATCC 19311T                                                               | 0.01344525 | 0.02952151 |
| Proteobacteria        | sf_1  | 8836  | <i>Legionella pneumophila</i> str. Paris                                                                        | 0.01344621 | 0.02952151 |
| Proteobacteria        | sf_1  | 7879  |                                                                                                                 | 0.01350733 | 0.02952151 |
| Proteobacteria        | sf_3  | 10432 | <i>Riftia pachyptila</i> 's tube clone R76-B51                                                                  | 0.0135302  | 0.02952151 |
| Proteobacteria        | sf_1  | 8344  | <i>Anabaena circinalis</i> AWQC118C isolate str. UNSW3                                                          | 0.01353411 | 0.02952151 |
| Proteobacteria        | sf_1  | 7555  | derived microbial 'pearl'- community clone sipK48                                                               | 0.01372561 | 0.02972761 |
| Proteobacteria        | sf_1  | 9310  | <i>Pseudomonas</i> sp. str. AC-167                                                                              | 0.0138204  | 0.02972761 |
| Proteobacteria        | sf_3  | 9291  | <i>Methylophaga alcalica</i> str. M39                                                                           | 0.01385625 | 0.02972761 |
| Verrucomicrobia       | sf_1  | 1024  | rumen clone BS5                                                                                                 | 0.01387923 | 0.02972761 |
| Actinobacteria        | sf_1  | 1893  | <i>Kineosporia aurantiaca</i> str. NRLL B-16913                                                                 | 0.01394018 | 0.02972761 |
| Proteobacteria        | sf_3  | 9269  |                                                                                                                 | 0.01401322 | 0.02972761 |
| Proteobacteria        | sf_1  | 7029  |                                                                                                                 | 0.01402301 | 0.02972761 |
| Proteobacteria        | sf_1  | 8576  | <i>Halomonas</i> sp. Ko502                                                                                      | 0.01404972 | 0.02972761 |
| Chloroflexi           | sf_9  | 94    | DCP-dechlorinating consortium clone SHA-2                                                                       | 0.01405885 | 0.02972761 |
| Proteobacteria        | sf_1  | 7171  | <i>Azospirillum</i> species                                                                                     | 0.01405913 | 0.02972761 |
| Proteobacteria        | sf_1  | 7096  |                                                                                                                 | 0.01407922 | 0.02972761 |
| Chloroflexi           | sf_2  | 652   | uranium mining waste pile soil sample clone JG30-KF-CM45                                                        | 0.01411216 | 0.02972761 |
| Proteobacteria        | sf_3  | 7401  | <i>Scrippsiella trochoidea</i> NEPCC 15                                                                         | 0.01419334 | 0.02972761 |
| Firmicutes            | sf_1  | 3955  | Weeping tea tree witches'-broom phytoplasma tree                                                                | 0.01419802 | 0.02972761 |
| Proteobacteria        | sf_1  | 9845  | uranium mining waste pile clone JG37-AG-128 proteobacterium                                                     | 0.01420284 | 0.02972761 |
| Proteobacteria        | sf_1  | 8512  | marine sediment clone B2M54                                                                                     | 0.01425426 | 0.02975504 |
| Proteobacteria        | sf_20 | 6911  |                                                                                                                 | 0.01430063 | 0.02977179 |
| Actinobacteria        | sf_1  | 1312  |                                                                                                                 | 0.01442103 | 0.02994218 |

|                |       |       |                                                                                                             |            |            |
|----------------|-------|-------|-------------------------------------------------------------------------------------------------------------|------------|------------|
| Proteobacteria | sf_1  | 7264  | <i>Bosea thiooxidans</i> TJ1                                                                                | 0.01446565 | 0.02995473 |
| Proteobacteria | sf_3  | 9568  | forested wetland clone RCP2-96                                                                              | 0.01457058 | 0.03009177 |
| Proteobacteria | sf_1  | 7543  | Waste-gas biofilter clone BIwii1                                                                            | 0.01463866 | 0.03015218 |
| Actinobacteria | sf_1  | 1240  | Cellulomonadaceae str. WB9                                                                                  | 0.01474128 | 0.03017166 |
| Firmicutes     | sf_5  | 2679  | termite gut homogenate clone BCf9-13                                                                        | 0.01482513 | 0.03017166 |
| Firmicutes     | sf_1  | 3630  |                                                                                                             | 0.01486418 | 0.03017166 |
| Proteobacteria | sf_1  | 7674  | <i>Azoarcus anaerobius</i> str. LuFres1; DSM 12081                                                          | 0.01488188 | 0.03017166 |
| Proteobacteria | sf_1  | 7110  | <i>Novosphingobium subarcticum</i> LH128                                                                    | 0.01489128 | 0.03017166 |
| Proteobacteria | sf_1  | 7771  | <i>Burkholderia glathei</i> str. ATCC 29195T<br>lichen-dominated Antarctic cryptoendolithic community clone | 0.01491847 | 0.03017166 |
| Actinobacteria | sf_3  | 1348  | FBP406                                                                                                      | 0.01492867 | 0.03017166 |
| Firmicutes     | sf_1  | 4074  | swine intestine clone p-2013-s959-5                                                                         | 0.01495895 | 0.03017166 |
| Proteobacteria | sf_1  | 7281  | <i>Fulvimarina pelagi</i> str. HTCC2506                                                                     | 0.01506779 | 0.03024421 |
| Proteobacteria | sf_3  | 9456  | deepest cold-seep area Japan Trench clone JTB23 proteobacterium                                             | 0.01507282 | 0.03024421 |
| Firmicutes     | sf_12 | 2764  |                                                                                                             | 0.01512349 | 0.03026768 |
| Proteobacteria | sf_3  | 9912  | uranium mining waste pile clone JG34-KF-14 proteobacterium                                                  | 0.01526031 | 0.03046299 |
| Proteobacteria | sf_4  | 8169  | forested wetland clone RCP2-54                                                                              | 0.01535705 | 0.0305775  |
| Firmicutes     | sf_5  | 3112  | Evry municipal wastewater treatment plant clone 012C11_B_SD_P15                                             | 0.01540327 | 0.03059109 |
| Proteobacteria | sf_3  | 10467 |                                                                                                             | 0.01548437 | 0.03063968 |
| Actinobacteria | sf_1  | 1884  | <i>Corynebacterium tuberculostearicum</i> str. ATCC 33035                                                   | 0.01552279 | 0.03063968 |
| Proteobacteria | sf_1  | 8854  | <i>Halomonas variabilis</i> str. ANT9112                                                                    | 0.01554611 | 0.03063968 |
| Firmicutes     | sf_12 | 4548  | termite gut homogenate clone Rs-Q69 bacterium                                                               | 0.015655   | 0.03071343 |
| Actinobacteria | sf_1  | 1551  | soil isolate Ellin301                                                                                       | 0.01567861 | 0.03071343 |
| Proteobacteria | sf_3  | 9874  | uranium mining waste pile clone JG34-KF-243 proteobacterium                                                 | 0.01573574 | 0.03071343 |
| Proteobacteria | sf_3  | 7024  | deep-sea sediment clone P_wp0211                                                                            | 0.01579186 | 0.03071343 |
| OD1            | sf_1  | 515   |                                                                                                             | 0.01581403 | 0.03071343 |
| Proteobacteria | sf_1  | 7049  |                                                                                                             | 0.01582084 | 0.03071343 |
| Proteobacteria | sf_1  | 8145  | <i>Nitrosomonas eutropha</i> str. Nm57                                                                      | 0.0160352  | 0.03100811 |
| Proteobacteria | sf_1  | 7090  | <i>Blastomonas natatoria</i> str. DSM 3183T                                                                 | 0.0160525  | 0.03100811 |
| Bacteroidetes  | sf_5  | 6084  | <i>Microscilla arenaria</i> str. IFO 15982                                                                  | 0.01625047 | 0.03127817 |
| Actinobacteria | sf_1  | 1723  | <i>Corynebacterium</i> sp str. CDC G5911                                                                    | 0.01631204 | 0.03127817 |
| Proteobacteria | sf_2  | 594   | uranium mining mill tailing clone GR-296.II.52 GR-296.I.52                                                  | 0.01631314 | 0.03127817 |
| Proteobacteria | sf_1  | 8002  | <i>Rubrivivax gelatinosus</i> str. A3                                                                       | 0.01643426 | 0.03143279 |

|                |       |       |                                                                                                       |            |            |
|----------------|-------|-------|-------------------------------------------------------------------------------------------------------|------------|------------|
| Bacteroidetes  | sf_1  | 5901  | Arctic sea ice ARK10159                                                                               | 0.01650135 | 0.03148355 |
| Actinobacteria | sf_1  | 1834  | <i>Nocardia transvalensis</i> str. DSM 43405                                                          | 0.01657152 | 0.03153994 |
| Actinobacteria | sf_1  | 1456  | <i>Rathayibacter rathayi</i> str. DSM 7485                                                            | 0.01676079 | 0.03182219 |
| Proteobacteria | sf_1  | 8531  | <i>Vibrio wodanis</i> str. NVI 88/441T                                                                | 0.01682138 | 0.03185931 |
| Actinobacteria | sf_1  | 1912  | <i>Agromyces rhizosphaerae</i> str. IFO 16236                                                         | 0.01696747 | 0.03189344 |
| Proteobacteria | sf_1  | 7829  | <i>Xylophilus ampelinus</i> str. ATCC 33914                                                           | 0.01698362 | 0.03189344 |
| Proteobacteria | sf_3  | 6762  | acidic forest soil clone UP8                                                                          | 0.01698723 | 0.03189344 |
| Actinobacteria | sf_3  | 1114  |                                                                                                       | 0.01700368 | 0.03189344 |
| Proteobacteria | sf_1  | 6649  | <i>Rhizobium giardinii</i> str. H152                                                                  | 0.01706504 | 0.0319314  |
| Nitrospira     | sf_2  | 542   | forested wetland clone FW19                                                                           | 0.01713684 | 0.03195631 |
| Proteobacteria | sf_3  | 10438 | hydrocarbon seep clone GCA014                                                                         | 0.01716066 | 0.03195631 |
| Proteobacteria | sf_4  | 9741  | uranium mining waste pile clone JG37-AG-30 proteobacterium                                            | 0.01730112 | 0.03196273 |
| Spirochaetes   | sf_1  | 6506  | termite gut homogenate clone Rs-J58 sp.                                                               | 0.01730293 | 0.03196273 |
| Firmicutes     | sf_11 | 39    | forested wetland clone RCP2-71                                                                        | 0.01730618 | 0.03196273 |
| Proteobacteria | sf_1  | 7199  | uranium mill tailings clone Gitt-KF-194                                                               | 0.01732875 | 0.03196273 |
| Proteobacteria | sf_1  | 8889  | hypersaline Mono Lake clone ML110J-5                                                                  | 0.01741599 | 0.03204753 |
| Actinobacteria | sf_1  | 1779  | <i>Microbacterium</i> sp. str. VKM Ac-2048                                                            | 0.01766163 | 0.03213003 |
| Planctomycetes | sf_3  | 4677  | aerobic basin clone CY0ARA032A03                                                                      | 0.01770411 | 0.03213003 |
| Proteobacteria | sf_1  | 7838  | <i>Alcaligenes defragrans</i> str. PD-19                                                              | 0.0177164  | 0.03213003 |
| Firmicutes     | sf_12 | 132   | termite gut homogenate clone Rs-J36 bacterium                                                         | 0.01777202 | 0.03213003 |
| Proteobacteria | sf_1  | 7147  |                                                                                                       | 0.01777656 | 0.03213003 |
| Proteobacteria | sf_1  | 8812  | <i>Oceanisphaera litoralis</i> str. DSM 15406                                                         | 0.01786083 | 0.03213003 |
| Proteobacteria | sf_2  | 6639  |                                                                                                       | 0.01787261 | 0.03213003 |
| Proteobacteria | sf_3  | 6651  | <i>Beijerinckia indica</i>                                                                            | 0.0179012  | 0.03213003 |
| Proteobacteria | sf_1  | 7818  | soil sample uranium mining waste pile near town Johanngeorgenstadt clone JG36-TzT-215 proteobacterium | 0.01790771 | 0.03213003 |
| Bacteroidetes  | sf_1  | 5479  | <i>Flavobacterium frigoris</i> str. LMG 21471                                                         | 0.01791245 | 0.03213003 |
| Actinobacteria | sf_1  | 1917  | <i>Nocardia otitidiscaviarum</i> str. DSM43242                                                        | 0.01791597 | 0.03213003 |
| Actinobacteria | sf_1  | 1385  | <i>Streptomonospora salina</i> str. YIM90002                                                          | 0.01798903 | 0.03218672 |
| Actinobacteria | sf_1  | 1694  | <i>Geodermatophilus obscurus</i> subsp. dictyosporus str. DSM 43161                                   | 0.01836634 | 0.03271108 |
| Proteobacteria | sf_1  | 8839  | f cytometric sorted marine sample subpopulation 3 clone ZD0408 bacterium                              | 0.01837239 | 0.03271108 |
| Spirochaetes   | sf_1  | 6532  | termite gut clone NkS39                                                                               | 0.01840847 | 0.03271108 |

|                 |      |       |                                                                                                                  |            |            |
|-----------------|------|-------|------------------------------------------------------------------------------------------------------------------|------------|------------|
| Proteobacteria  | sf_3 | 8664  | <i>Thiomicrospira</i> sp. str. Milos-T2                                                                          | 0.01853539 | 0.03283825 |
| Proteobacteria  | sf_3 | 8727  | <i>Alkanindiges hongkongensis</i> str. HKU9                                                                      | 0.01861108 | 0.03283825 |
| Verrucomicrobia | sf_3 | 40    | Elbe river clone DEV055                                                                                          | 0.01865359 | 0.03283825 |
| Proteobacteria  | sf_1 | 8580  | Arctic seawater isolate str. R7076                                                                               | 0.01868788 | 0.03283825 |
| Actinobacteria  | sf_1 | 1867  | <i>Amycolatopsis vancoresmycina</i> str. DSM 44592                                                               | 0.01870126 | 0.03283825 |
| Firmicutes      | sf_1 | 4261  | termite gut homogenate clone Rs-G04 bacterium                                                                    | 0.01873376 | 0.03283825 |
| Proteobacteria  | sf_1 | 7743  | <i>Herbaspirillum</i> sp. str. NAH4                                                                              | 0.01890794 | 0.03304643 |
| Actinobacteria  | sf_1 | 1569  | <i>Streptomyces sampsonii</i> str. ATCC25495                                                                     | 0.01904289 | 0.03304643 |
| Proteobacteria  | sf_1 | 7038  | pea aphid symbiont clone APe4_19                                                                                 | 0.01905533 | 0.03304643 |
| Proteobacteria  | sf_1 | 9828  | termite gut homogenate clone Rs-M89 proteobacterium                                                              | 0.01908731 | 0.03304643 |
| Acidobacteria   | sf_1 | 4222  | forested wetland clone FW105                                                                                     | 0.01910951 | 0.03304643 |
| Bacteroidetes   | sf_1 | 5942  |                                                                                                                  | 0.01912679 | 0.03304643 |
| Proteobacteria  | sf_1 | 9220  | unclassified Lamellibrachia sp. 1 symbiont Lamellibrachia                                                        | 0.01916295 | 0.03304643 |
| Proteobacteria  | sf_3 | 10298 | marine tidal mat clone BTM36                                                                                     | 0.01919297 | 0.03304643 |
| Actinobacteria  | sf_1 | 1983  | <i>Streptomyces cinnabarinus</i> str. ISP 5467                                                                   | 0.01925763 | 0.03308439 |
| Actinobacteria  | sf_1 | 1274  | <i>Trichotomospora caesia</i> str. IFO14562                                                                      | 0.0194212  | 0.03324521 |
| Proteobacteria  | sf_1 | 7704  | freshwater clone PRD01b009B                                                                                      | 0.01943686 | 0.03324521 |
| Proteobacteria  | sf_3 | 10538 | <i>Arcobacter cryaerophilus</i>                                                                                  | 0.0196309  | 0.0335033  |
| Actinobacteria  | sf_1 | 1666  |                                                                                                                  | 0.01969365 | 0.03353669 |
| Proteobacteria  | sf_1 | 7788  | atrazine-catabolizing microbial absence methanol clone KRA30-58                                                  | 0.01977574 | 0.03357752 |
| Firmicutes      | sf_5 | 1037  | <i>Finegoldia magna</i>                                                                                          | 0.01980411 | 0.03357752 |
| Proteobacteria  | sf_1 | 8018  | <i>Acidovorax delafieldii</i> str. ATCC 17505<br>sediments collected at Charon's Cascade near Echo River October | 0.01988654 | 0.03364382 |
| Chloroflexi     | sf_9 | 72    | 2000 clone CCD21                                                                                                 | 0.02000154 | 0.03376481 |
| Actinobacteria  | sf_1 | 1581  | <i>Cryptosporangium aurantiacum</i> str. IMSNU 22120                                                             | 0.02010797 | 0.03384954 |
| Proteobacteria  | sf_1 | 8503  | Arctic sea ice ARK10244                                                                                          | 0.02016928 | 0.03384954 |
| Proteobacteria  | sf_1 | 8654  | inactive deep-sea hydrothermal vent chimneys clone IheB2-31                                                      | 0.02020085 | 0.03384954 |
| Actinobacteria  | sf_1 | 1849  |                                                                                                                  | 0.02029062 | 0.03384954 |
| Proteobacteria  | sf_1 | 9542  | <i>Alishewanella fetalis</i> str. CCUG 30811                                                                     | 0.02035096 | 0.03384954 |
| Actinobacteria  | sf_1 | 1667  | <i>Microbacterium lacticum</i>                                                                                   | 0.02036994 | 0.03384954 |
| Proteobacteria  | sf_1 | 9143  | <i>Pseudoalteromonas agarivorans</i> str. KMM 255                                                                | 0.0203909  | 0.03384954 |
| Proteobacteria  | sf_3 | 468   | marine sediment clone Sva0515                                                                                    | 0.02040045 | 0.03384954 |
| Proteobacteria  | sf_1 | 9128  | <i>Lucina nassula</i> gill symbiont                                                                              | 0.02048751 | 0.03388949 |

|                 |        |       |                                                                                                       |            |            |
|-----------------|--------|-------|-------------------------------------------------------------------------------------------------------|------------|------------|
| Proteobacteria  | sf_3   | 8983  | Iron oxidising strain ES-1<br>silica sinter depositing geothermal power station discharge drain clone | 0.02051181 | 0.03388949 |
| Proteobacteria  | sf_1   | 8896  | ST01-SN4A proteobacterium                                                                             | 0.02060508 | 0.03392958 |
| Actinobacteria  | sf_1   | 1639  | <i>Streptomyces coelicolor</i> str. M145 ssp. A3(2)                                                   | 0.02062347 | 0.03392958 |
| Proteobacteria  | sf_1   | 7675  | <i>Neisseria</i> sp. str. CCUG 46910                                                                  | 0.02068587 | 0.03393297 |
| Proteobacteria  | sf_1   | 7827  |                                                                                                       | 0.02071292 | 0.03393297 |
| Proteobacteria  | sf_1   | 9058  | <i>Pseudoalteromonas carrageenovora</i> str. ATCC 12662T                                              | 0.02082171 | 0.03403937 |
| Proteobacteria  | sf_1   | 8231  | uranium waste soil clone JG30a-KF-21                                                                  | 0.0209011  | 0.03409738 |
| Chloroflexi     | sf_1   | 927   | hydrothermal vent polychaete mucous clone P. palm C 37                                                | 0.02095772 | 0.03411807 |
| Verrucomicrobia | sf_1   | 559   | anoxic marine sediment clone LD1-PA20                                                                 | 0.02102546 | 0.03415572 |
| Bacteroidetes   | sf_1   | 5955  | <i>Flavobacterium</i> sp. str. V4.MS.29 = MM_2747                                                     | 0.02106914 | 0.03415572 |
| Acidobacteria   | sf_6   | 6362  | grassland soil clone DA052                                                                            | 0.02111281 | 0.03415572 |
| Proteobacteria  | sf_1   | 9709  | termite gut homogenate clone Rs-N31 proteobacterium                                                   | 0.02124676 | 0.03425383 |
| Bacteroidetes   | sf_1   | 5459  | <i>Pedobacter</i> sp. An13                                                                            | 0.02126167 | 0.03425383 |
| Proteobacteria  | sf_1   | 9068  | <i>Pseudomonas stutzeri</i> str. A1501                                                                | 0.02130579 | 0.03425384 |
| Nitrospira      | sf_1   | 984   | uranium mining waste pile clone JG37-AG-131 sp.                                                       | 0.02145823 | 0.03442764 |
| Proteobacteria  | sf_1   | 8110  | <i>Wautersia paucula</i> str. LMG 3413                                                                | 0.02164836 | 0.03466107 |
| Proteobacteria  | sf_1   | 7339  |                                                                                                       | 0.02172257 | 0.03470485 |
| Proteobacteria  | sf_1   | 10543 | hydrothermal vent clone PVB_10                                                                        | 0.02176509 | 0.03470485 |
| Bacteroidetes   | sf_1   | 5436  | Arctic sea ice ARK10004                                                                               | 0.02190373 | 0.03485435 |
| Firmicutes      | sf_5   | 2456  | granular sludge clone R4b14                                                                           | 0.02200337 | 0.03487656 |
| Firmicutes      | sf_5   | 2483  | trichloroethene-contaminated site clone FTLM142 bacterium                                             | 0.02200751 | 0.03487656 |
| Proteobacteria  | sf_1   | 7921  | <i>Collimonas fungivorans</i> str. Ter331                                                             | 0.02209018 | 0.03493627 |
| Proteobacteria  | sf_1   | 7323  |                                                                                                       | 0.02220505 | 0.03504656 |
| Unclassified    | sf_160 | 6430  |                                                                                                       | 0.02229884 | 0.03505372 |
| Proteobacteria  | sf_1   | 8932  | <i>Pseudoalteromonas antarctica</i> str. N-1                                                          | 0.02229987 | 0.03505372 |
| Proteobacteria  | sf_1   | 9369  | <i>Pseudoalteromonas luteoviolacea</i> str. NCIMB 1893T                                               | 0.02254911 | 0.0353739  |
| Actinobacteria  | sf_1   | 1223  | <i>Sporichthya polymorpha</i> str. IFO 12702                                                          | 0.02277701 | 0.03555934 |
| Proteobacteria  | sf_3   | 7219  | <i>Methylosinus sporium</i>                                                                           | 0.02279642 | 0.03555934 |
| Proteobacteria  | sf_1   | 8003  | hydrocarbon-degrading consortium clone AF1-8                                                          | 0.0228047  | 0.03555934 |
| Proteobacteria  | sf_1   | 6899  |                                                                                                       | 0.02288174 | 0.03560796 |
| Proteobacteria  | sf_1   | 9640  | exposed to diatom detritus isolate str. Tw-10 Tw-10                                                   | 0.02299018 | 0.03562131 |
| Proteobacteria  | sf_1   | 7550  | soil clone 768-2                                                                                      | 0.02311962 | 0.03562131 |

|                |      |      |                                                                                                               |            |            |
|----------------|------|------|---------------------------------------------------------------------------------------------------------------|------------|------------|
| Bacteroidetes  | sf_1 | 5971 | <i>Cytophaga uliginosa</i>                                                                                    | 0.02319109 | 0.03562131 |
| Proteobacteria | sf_1 | 7928 | penguin droppings sediments clone KD5-43                                                                      | 0.02322706 | 0.03562131 |
| Proteobacteria | sf_1 | 7436 | <i>Brevundimonas</i> sp. str. FWC40                                                                           | 0.02329121 | 0.03562131 |
| Proteobacteria | sf_1 | 9324 | <i>Pseudoalteromonas ruthenica</i> str. KMM300                                                                | 0.02330109 | 0.03562131 |
| Proteobacteria | sf_6 | 6918 | soil near uranium mill tailings clone KCM-C-45<br>Toolik Lake main station at 3 m depth clone TLM05/TLMdgge10 | 0.02331846 | 0.03562131 |
| Proteobacteria | sf_1 | 7801 | proteobacterium                                                                                               | 0.02331919 | 0.03562131 |
| NC10           | sf_1 | 2516 | TCE-contaminated site clone FTL22                                                                             | 0.02335703 | 0.03562131 |
| Proteobacteria | sf_1 | 7528 | <i>Sphingobium yanoikuyae</i> str. GIFU9882                                                                   | 0.02337382 | 0.03562131 |
| Proteobacteria | sf_6 | 6694 | forested wetland clone RCP2-92                                                                                | 0.02339491 | 0.03562131 |
| Actinobacteria | sf_1 | 1804 | <i>Microbacterium resistens</i> str. 2002-59119                                                               | 0.02346093 | 0.03565193 |
| Proteobacteria | sf_1 | 7969 | <i>Burkholderia</i> sp.                                                                                       | 0.02371533 | 0.0358706  |
| Proteobacteria | sf_1 | 9203 | <i>Thalassomonas ganghwensis</i> str. JC2041                                                                  | 0.02371869 | 0.0358706  |
| Proteobacteria | sf_1 | 8139 | <i>Delftia tsuruhatensis</i> str. AD9                                                                         | 0.02374341 | 0.0358706  |
| Proteobacteria | sf_1 | 8022 | <i>Acidovorax avenae</i> subsp. <i>cattleyae</i> str. NCPPB 961 subsp.                                        | 0.02395514 | 0.03612021 |
| Bacteroidetes  | sf_1 | 5997 | <i>Flavobacterium aquatile</i>                                                                                | 0.02401921 | 0.03614662 |
| Proteobacteria | sf_1 | 9491 | Boston Harbor surface water isolate str. UMB6D UMB6D                                                          | 0.02411664 | 0.03622305 |
| Chloroflexi    | sf_1 | 2485 |                                                                                                               | 0.02421448 | 0.03629979 |
| Proteobacteria | sf_3 | 9755 | bacterioplankton clone ZA3704c                                                                                | 0.02437721 | 0.03647333 |
| Proteobacteria | sf_1 | 8021 | <i>Acidovorax facilis</i> str. CCUG 2113                                                                      | 0.02449907 | 0.03657992 |
| Proteobacteria | sf_1 | 7866 | <i>Paucimonas lemoignei</i> str. ATCC 17989T                                                                  | 0.02459183 | 0.03657992 |
| Proteobacteria | sf_1 | 7766 |                                                                                                               | 0.02462955 | 0.03657992 |
| Proteobacteria | sf_1 | 8581 | <i>Shewanella benthica</i> str. DB21MT-2                                                                      | 0.02463688 | 0.03657992 |
| Proteobacteria | sf_1 | 8579 | <i>Psychromonas profunda</i> str. 2825                                                                        | 0.02472202 | 0.03663628 |
| Actinobacteria | sf_1 | 1769 | <i>Nocardia</i> sp. str. DSM 46067                                                                            | 0.02491023 | 0.03684489 |
| Proteobacteria | sf_1 | 8605 | bacterioplankton clone ZA2525c                                                                                | 0.02505779 | 0.03690997 |
| Proteobacteria | sf_1 | 7888 | <i>Hydrogenophaga flava</i> str. DSM 619T                                                                     | 0.02505913 | 0.03690997 |
| Actinobacteria | sf_1 | 1698 | <i>Corynebacterium</i> subsp. <i>afermentans</i> str. CIP 103499T                                             | 0.0251071  | 0.03690997 |
| Proteobacteria | sf_1 | 9295 |                                                                                                               | 0.02516815 | 0.03690997 |
| Proteobacteria | sf_1 | 8152 | nephridia <i>Octolasion lacteum</i> clone OI2-2                                                               | 0.0251956  | 0.03690997 |
| Actinobacteria | sf_1 | 1921 | Firmicutes isolate str. d8                                                                                    | 0.02526816 | 0.03690997 |
| Firmicutes     | sf_5 | 2722 | termite gut homogenate clone Rs-E61 bacterium                                                                 | 0.0253164  | 0.03690997 |
| Actinobacteria | sf_1 | 1690 | <i>Streptomyces galbus</i> str. DSM40480                                                                      | 0.02536669 | 0.03690997 |

|                 |       |      |                                                                         |            |            |
|-----------------|-------|------|-------------------------------------------------------------------------|------------|------------|
| Actinobacteria  | sf_1  | 1365 | <i>Mycobacterium chelonae</i> str. CIP 104535T                          | 0.02538202 | 0.03690997 |
| Actinobacteria  | sf_1  | 1142 |                                                                         | 0.02560858 | 0.03703851 |
| Bacteroidetes   | sf_1  | 5482 |                                                                         | 0.02566416 | 0.03703851 |
| Proteobacteria  | sf_1  | 8888 | <i>Vibrio aestuarianus</i> str. 01/151                                  | 0.02568965 | 0.03703851 |
| Proteobacteria  | sf_3  | 7153 | <i>Methylocella tundrae</i> str. Y1                                     | 0.02572308 | 0.03703851 |
| Spirochaetes    | sf_1  | 6523 | termite gut homogenate clone Rs-J64 sp.                                 | 0.02573094 | 0.03703851 |
| Verrucomicrobia | sf_4  | 169  | anoxic marine sediment clone LD1-PA26                                   | 0.02575566 | 0.03703851 |
| Nitrospira      | sf_1  | 864  | nitrifying sludge clone GC86                                            | 0.02598975 | 0.03717954 |
| Proteobacteria  | sf_1  | 7007 |                                                                         | 0.0261618  | 0.03717954 |
| Cyanobacteria   | sf_5  | 4993 | <i>Oscillatoria</i> sp                                                  | 0.02618858 | 0.03717954 |
| Actinobacteria  | sf_1  | 1633 | <i>Actinoplanes tuftoflagellus</i> str. IMSNU 22135                     | 0.02621339 | 0.03717954 |
| Actinobacteria  | sf_1  | 1404 | freshwater isolate str. MWH-Ta3                                         | 0.02627146 | 0.03717954 |
| DSS1            | sf_2  | 38   | DCP-dechlorinating consortium clone SHA-109                             | 0.02636014 | 0.03717954 |
| Actinobacteria  | sf_3  | 1743 | <i>Streptomyces scabiei</i> str. DNK-G01                                | 0.0263789  | 0.03717954 |
| Actinobacteria  | sf_1  | 1856 | forested wetland clone RCP2-105                                         | 0.02639574 | 0.03717954 |
| Firmicutes      | sf_1  | 2388 | G+C Gram-positive clone YNPRH70A                                        | 0.02639638 | 0.03717954 |
| Spirochaetes    | sf_1  | 6494 | termite gut homogenate clone Rs-C47 sp.                                 | 0.02640508 | 0.03717954 |
| Proteobacteria  | sf_1  | 7165 | <i>Sphingomonas</i> sp. str. IW3                                        | 0.0264169  | 0.03717954 |
| Proteobacteria  | sf_1  | 9658 | <i>Alcanivorax</i> sp. str. Haw1                                        | 0.02642922 | 0.03717954 |
| Proteobacteria  | sf_3  | 8703 | <i>Beggiatoa</i> sp. str. AA5A                                          | 0.02656165 | 0.03723648 |
| Proteobacteria  | sf_1  | 7750 | uranium mining waste pile near Johanngeorgenstadt soil clone JG37-AG-35 | 0.0265656  | 0.03723648 |
| Proteobacteria  | sf_1  | 7067 | <i>Blastochloris sulfovirdis</i> str. GN1                               | 0.0267151  | 0.03737856 |
| Proteobacteria  | sf_1  | 9246 | Mammoth Cave sediment clone CCD24                                       | 0.02686362 | 0.03751876 |
| Proteobacteria  | sf_1  | 7754 | Waste-gas biofilter clone BIfdi44                                       | 0.02702223 | 0.03767252 |
| Proteobacteria  | sf_3  | 8488 |                                                                         | 0.02721504 | 0.03787333 |
| Proteobacteria  | sf_1  | 6756 |                                                                         | 0.02737569 | 0.03797076 |
| Bacteroidetes   | sf_1  | 5367 | patient's bronchoalveolar lavage isolate str. MDA2507 sp.               | 0.02748604 | 0.03797076 |
| Proteobacteria  | sf_20 | 2520 |                                                                         | 0.0275294  | 0.03797076 |
| Proteobacteria  | sf_1  | 6822 |                                                                         | 0.02752954 | 0.03797076 |
| Proteobacteria  | sf_1  | 7101 |                                                                         | 0.02752954 | 0.03797076 |
| OP9/JS1         | sf_1  | 2491 | deep marine sediment clone MB-B2-103                                    | 0.02800902 | 0.0385636  |
| Bacteroidetes   | sf_19 | 5307 | <i>Microscilla sericea</i> str. IFO 16561                               | 0.02805907 | 0.03856413 |

|                     |       |       |                                                                                                                                |            |            |
|---------------------|-------|-------|--------------------------------------------------------------------------------------------------------------------------------|------------|------------|
| Proteobacteria      | sf_3  | 10411 | termite gut homogenate clone Rs-P71 proteobacterium                                                                            | 0.02838566 | 0.03887148 |
| Gemmatimonadetes    | sf_5  | 227   | uranium mining waste pile clone JG37-AG-36<br><i>Mixotricha paradoxa</i> is flagellate hindgut <i>Mastotermes darwiniensis</i> | 0.02842178 | 0.03887148 |
| Spirochaetes        | sf_1  | 6571  | clone mp4 of                                                                                                                   | 0.02849217 | 0.03887148 |
| Proteobacteria      | sf_1  | 9731  | uranium mining waste pile clone JG37-AG-90 proteobacterium                                                                     | 0.02852311 | 0.03887148 |
| Proteobacteria      | sf_1  | 7384  | aortic heart valve patient with endocarditis clone v9                                                                          | 0.02853299 | 0.03887148 |
| Firmicutes          | sf_1  | 4046  | Pigeon pea witches'-broom mycoplasma-like organism                                                                             | 0.02858591 | 0.03887538 |
| Proteobacteria      | sf_9  | 9975  | TCE-contaminated site clone ccslm247                                                                                           | 0.02865968 | 0.03890756 |
| Proteobacteria      | sf_1  | 8112  | <i>Comamonas testosteroni</i> str. SMCC B329                                                                                   | 0.02876742 | 0.03898568 |
| Actinobacteria      | sf_1  | 1861  | <i>Rhodococcus rhodochromus</i> str. 11Y                                                                                       | 0.02885706 | 0.03903902 |
| Proteobacteria      | sf_1  | 8046  | <i>Acidovorax defluvii</i> str. BSB411                                                                                         | 0.02915108 | 0.03936031 |
| Verrucomicrobia     | sf_7  | 29    | <i>Fucophilus fucoidanolyticus</i> str. SI-1234                                                                                | 0.02922866 | 0.03936031 |
| Bacteroidetes       | sf_19 | 5563  | <i>Cytophaga</i> sp. I-545                                                                                                     | 0.02931803 | 0.03936031 |
| Proteobacteria      | sf_6  | 6946  | Mammoth cave clone CCM12a                                                                                                      | 0.02932291 | 0.03936031 |
| Proteobacteria      | sf_6  | 7572  |                                                                                                                                | 0.02934799 | 0.03936031 |
| Verrucomicrobia     | sf_3  | 792   | termite gut homogenate clone Rs-P07 bacterium                                                                                  | 0.02948926 | 0.03937991 |
| Deinococcus-Thermus | sf_3  | 920   |                                                                                                                                | 0.02950827 | 0.03937991 |
| Cyanobacteria       | sf_1  | 5190  | <i>Plectonema</i> sp. str. F3                                                                                                  | 0.02956159 | 0.03937991 |
| Proteobacteria      | sf_1  | 7978  | <i>Variovorax paradoxus</i> str. IAM 12373                                                                                     | 0.02956545 | 0.03937991 |
| Proteobacteria      | sf_1  | 8128  | <i>Cupriavidus necator</i>                                                                                                     | 0.02970213 | 0.03949422 |
| Proteobacteria      | sf_3  | 9428  | hydrocarbon-degrading consortium clone AF2-1D                                                                                  | 0.02986924 | 0.03964853 |
| Proteobacteria      | sf_3  | 6803  | <i>Wolbachia</i> sp. Dlem16SWol                                                                                                | 0.0299852  | 0.03970013 |
| Actinobacteria      | sf_1  | 1965  | Arctic sea ice ARK10165                                                                                                        | 0.03001037 | 0.03970013 |
| Firmicutes          | sf_11 | 771   | <i>Dialister pneumosintes</i> str. ATCC 33048                                                                                  | 0.03031073 | 0.04000857 |
| Proteobacteria      | sf_1  | 10414 | penguin droppings sediments clone KD2-34                                                                                       | 0.03034657 | 0.04000857 |
| Proteobacteria      | sf_3  | 7640  | <i>Methylosinus trichosporium</i>                                                                                              | 0.03042133 | 0.04003915 |
| Proteobacteria      | sf_1  | 7576  | <i>Novosphingobium stygium</i> str. IFO 16085                                                                                  | 0.03064516 | 0.04016989 |
| Proteobacteria      | sf_5  | 9800  | forested wetland clone FW57                                                                                                    | 0.03065768 | 0.04016989 |
| Firmicutes          | sf_8  | 546   | <i>Ferribacter thermoautotrophicus</i>                                                                                         | 0.03067585 | 0.04016989 |
| Firmicutes          | sf_12 | 4265  | termite gut homogenate clone Rs-N70 bacterium<br>marine sediment above hydrate ridge clone Hyd89-61                            | 0.03074856 | 0.04019354 |
| Proteobacteria      | sf_5  | 10267 | proteobacterium                                                                                                                | 0.03080415 | 0.04019354 |
| Proteobacteria      | sf_5  | 6947  | termite gut homogenate clone Rs-B60 proteobacterium                                                                            | 0.03085796 | 0.04019354 |



|                |       |       |                                                               |            |            |
|----------------|-------|-------|---------------------------------------------------------------|------------|------------|
|                |       |       | marine sediment above hydrate ridge clone Hyd24-11            |            |            |
| Proteobacteria | sf_1  | 10062 | proteobacterium                                               | 0.03105235 | 0.04019354 |
| Proteobacteria | sf_1  | 10069 |                                                               | 0.03105289 | 0.04019354 |
| Proteobacteria | sf_1  | 9081  | <i>Shewanella</i> sp. str. MTW-1                              | 0.03105598 | 0.04019354 |
| Proteobacteria | sf_1  | 7845  | <i>Diaphorina citri</i> symbiont                              | 0.03105623 | 0.04019354 |
| Proteobacteria | sf_1  | 8596  | marine clone Arctic95B-7                                      | 0.03114609 | 0.04024276 |
| Proteobacteria | sf_1  | 8034  | <i>Janthinobacterium agaricidamnorum</i> str. W1r3T           | 0.03137327 | 0.04041273 |
| NC10           | sf_1  | 536   | uranium mill tailings clone GuBH2-AD-8                        | 0.03138172 | 0.04041273 |
| Actinobacteria | sf_1  | 2014  | marine sediment clone MB-A2-100                               | 0.03174583 | 0.04065615 |
| Proteobacteria | sf_3  | 10552 | <i>Helicobacter winhamensis</i> str. NLEP 97-1611             | 0.03175567 | 0.04065615 |
| Actinobacteria | sf_1  | 1432  | <i>Nocardia veterana</i> str. DSM 44445                       | 0.03176626 | 0.04065615 |
| Actinobacteria | sf_1  | 1739  |                                                               | 0.03178742 | 0.04065615 |
| Cyanobacteria  | sf_9  | 5164  | termite gut homogenate clone Rs-H34                           | 0.03189363 | 0.04065615 |
| Proteobacteria | sf_3  | 8959  | bacterioplankton clone AEGEAN_133                             | 0.0319343  | 0.04065615 |
| Proteobacteria | sf_1  | 6749  | Arctic sea ice ARK10031                                       | 0.03193753 | 0.04065615 |
| Actinobacteria | sf_1  | 1106  |                                                               | 0.03198959 | 0.04065615 |
| Firmicutes     | sf_5  | 224   | <i>Finegoldia magna</i> str. ATCC 29328                       | 0.03205341 | 0.04067069 |
| Proteobacteria | sf_1  | 10076 | Great Artesian Basin clone G13                                | 0.03248281 | 0.04110995 |
| Spirochaetes   | sf_1  | 6502  | <i>Treponema denticola</i> str. ATCC35405                     | 0.03250548 | 0.04110995 |
| Firmicutes     | sf_4  | 4526  | TCE-contaminated site clone ccslm210                          | 0.03296594 | 0.0416169  |
| Bacteroidetes  | sf_1  | 5914  | <i>Psychroserpens burtonensis</i> str. S2-64                  | 0.0330214  | 0.0416169  |
| Actinobacteria | sf_1  | 2005  | <i>Nocardioides</i> sp. str. V4.BO.15 = MM_2364               | 0.03306711 | 0.0416169  |
| Proteobacteria | sf_20 | 6763  |                                                               | 0.03317703 | 0.04168768 |
| Bacteroidetes  | sf_19 | 5728  | <i>Cytophaga</i> sp. str. MBIC04693                           | 0.03326088 | 0.04172552 |
| Bacteroidetes  | sf_1  | 6158  | municipal wastewater treatment bioreactor isolate str. CAGY10 | 0.03333958 | 0.04175679 |
| Bacteroidetes  | sf_19 | 6184  |                                                               | 0.03375886 | 0.04221384 |
| Actinobacteria | sf_1  | 1966  | TCE-contaminated site clone ccspost2208                       | 0.03387271 | 0.04222089 |
| Actinobacteria | sf_1  | 1104  | <i>Amycolatopsis mediterranei</i> str. NRRL B-3240            | 0.03387631 | 0.04222089 |
|                |       |       | <i>Candidatus Rhabdochlamydia porcellionis</i> clone RKPshPep |            |            |
| Chlamydiae     | sf_1  | 4702  | porcellionis                                                  | 0.0339276  | 0.04222089 |
| Actinobacteria | sf_1  | 1552  | <i>Nocardia cyriacigeorgica</i> str. D1627T                   | 0.03398679 | 0.04222687 |
| Actinobacteria | sf_1  | 1286  | <i>Frankia</i> sp. Sn5-8                                      | 0.03412426 | 0.04232994 |
| Proteobacteria | sf_1  | 7875  | EBPR sludge clone SA34                                        | 0.03418553 | 0.04233831 |

|                |        |       |                                                                                                                   |            |            |
|----------------|--------|-------|-------------------------------------------------------------------------------------------------------------------|------------|------------|
| Bacteroidetes  | sf_1   | 5480  | ED5 earthworm gut                                                                                                 | 0.03424144 | 0.04234002 |
| Proteobacteria | sf_1   | 8137  | freshwater clone PRD01a011B                                                                                       | 0.03448029 | 0.04256759 |
| Proteobacteria | sf_1   | 7865  |                                                                                                                   | 0.03461404 | 0.0425806  |
| Proteobacteria | sf_3   | 9641  | <i>Acinetobacter haemolyticus</i>                                                                                 | 0.03461543 | 0.0425806  |
| Firmicutes     | sf_5   | 3111  | rumen clone 6C3d-11                                                                                               | 0.03465534 | 0.0425806  |
| Proteobacteria | sf_1   | 7529  | <i>Gluconacetobacter europaeus</i> str. ZIM B028 V3<br>Mono Lake at depth 2 m station 6 July 2000 clone ML602J-47 | 0.03475019 | 0.04258388 |
| Proteobacteria | sf_1   | 9598  | proteobacterium                                                                                                   | 0.03476768 | 0.04258388 |
| Proteobacteria | sf_3   | 7954  |                                                                                                                   | 0.03502972 | 0.04283726 |
| Firmicutes     | sf_12  | 4627  | termite gut homogenate clone Rs-A13 bacterium                                                                     | 0.03511209 | 0.04287048 |
| Proteobacteria | sf_1   | 7965  | <i>Anoxobacterium dechloraticum</i>                                                                               | 0.0354646  | 0.0432329  |
| Firmicutes     | sf_5   | 4500  | <i>Ruminococcus bromii</i><br>uranium mill tailings soil sample clone Sh765B-TzT-29                               | 0.03557315 | 0.04326047 |
| Proteobacteria | sf_1   | 10021 | proteobacterium                                                                                                   | 0.03559864 | 0.04326047 |
| Proteobacteria | sf_1   | 10475 | hydrothermal sediment clone AF420359                                                                              | 0.03568932 | 0.0433029  |
| Proteobacteria | sf_1   | 7822  | <i>Polaromonas naphthalenivorans</i> str. CJ2                                                                     | 0.03578689 | 0.04330729 |
| Proteobacteria | sf_1   | 10212 |                                                                                                                   | 0.03580447 | 0.04330729 |
| Proteobacteria | sf_6   | 7107  | <i>Stappia aggregata</i> str. IAM12614                                                                            | 0.03603092 | 0.04350618 |
| Cyanobacteria  | sf_1   | 4999  | <i>Geitlerinema</i> sp. str. PCC 7105                                                                             | 0.03608096 | 0.04350618 |
| Proteobacteria | sf_3   | 9392  | <i>Methylophaga</i> sp. str. V4.ME.29 = MM_2343                                                                   | 0.03624032 | 0.0436257  |
| Proteobacteria | sf_15  | 7035  | <i>Sphingomonas asaccharolytica</i> str. IFO 10564-T                                                              | 0.0362995  | 0.0436257  |
| Firmicutes     | sf_1   | 3898  | compost clone 4-28                                                                                                | 0.03638912 | 0.0436257  |
| Proteobacteria | sf_3   | 9359  | <i>Acinetobacter junii</i> str. S33                                                                               | 0.0364048  | 0.0436257  |
| WS3            | sf_1   | 2537  | anoxic marine sediment clone LD1-PA39                                                                             | 0.03650694 | 0.04366713 |
| Actinobacteria | sf_1   | 1542  | <i>Actinoplanes garbadinensis</i> str. IMSNU 20040                                                                | 0.0366047  | 0.04366713 |
| Proteobacteria | sf_6   | 7647  |                                                                                                                   | 0.03665377 | 0.04366713 |
| Proteobacteria | sf_1   | 8645  | <i>Methylomicrobium buryatense</i> str. 5B                                                                        | 0.03666431 | 0.04366713 |
| Actinobacteria | sf_1   | 1135  | <i>Rhodoglobus vestalii</i> str. LV3                                                                              | 0.03691018 | 0.04383607 |
| Cyanobacteria  | sf_1   | 5219  | <i>Synechococcus</i> sp. str. UH7                                                                                 | 0.03691906 | 0.04383607 |
| Proteobacteria | sf_1   | 9062  | <i>Aeromonas</i> subsp. <i>salmonicida</i> str. NCIMB 1102                                                        | 0.03699263 | 0.04384416 |
| Unclassified   | sf_160 | 6456  |                                                                                                                   | 0.0370388  | 0.04384416 |
| Proteobacteria | sf_3   | 9211  | penguin droppings sediments clone KD8-80                                                                          | 0.03709552 | 0.04384447 |
| Proteobacteria | sf_1   | 9339  | <i>Pseudoalteromonas</i> sp. str. 05                                                                              | 0.03720666 | 0.04386485 |

|                 |      |       |                                                  |            |            |
|-----------------|------|-------|--------------------------------------------------|------------|------------|
| Planctomycetes  | sf_3 | 4670  |                                                  | 0.03722574 | 0.04386485 |
| Firmicutes      | sf_5 | 3218  | termite gut homogenate clone Rs-N53              | 0.03741684 | 0.04402323 |
| Actinobacteria  | sf_1 | 1315  | <i>Friedmanniella lacustris</i> str. EL-17a      | 0.03774783 | 0.04418384 |
| Actinobacteria  | sf_1 | 1972  | <i>Actinoplanes regularis</i> str. IFO 12514T    | 0.03778048 | 0.04418384 |
| Proteobacteria  | sf_1 | 6661  | <i>Methylarcula</i> sp. BIO-24                   | 0.03778073 | 0.04418384 |
| Proteobacteria  | sf_4 | 6810  | marine bacterioplankton clone MB13F01            | 0.03778095 | 0.04418384 |
| Proteobacteria  | sf_1 | 7130  | Gram-negative MM 1                               | 0.03786185 | 0.04421188 |
| Proteobacteria  | sf_1 | 7984  | Waste-gas biofilter clone BIfciii38              | 0.03798253 | 0.0442862  |
| Proteobacteria  | sf_1 | 7807  | <i>Aquaspirillum metamorphum</i> str. DSM 1837   | 0.03805957 | 0.0443095  |
| OP10            | sf_1 | 326   | geothermal clone ST01-SN3H                       | 0.03826231 | 0.04447884 |
| Actinobacteria  | sf_1 | 1901  | earthworm burrow isolate B33D1                   | 0.03841458 | 0.04458607 |
| Proteobacteria  | sf_1 | 7527  |                                                  | 0.03846939 | 0.04458607 |
| Actinobacteria  | sf_1 | 1758  | glacial ice isolate str. SB12K-2-1               | 0.03860772 | 0.04467971 |
| Verrucomicrobia | sf_6 | 871   |                                                  | 0.03893545 | 0.04499194 |
| Proteobacteria  | sf_1 | 7925  | <i>Thauera selenatis</i> str. ATCC 55363T        | 0.03913719 | 0.04512895 |
| Proteobacteria  | sf_3 | 8676  |                                                  | 0.03917026 | 0.04512895 |
| Proteobacteria  | sf_1 | 9956  | forested wetland clone FW140                     | 0.03943973 | 0.0453721  |
| Proteobacteria  | sf_1 | 7823  | <i>Wautersia basileensis</i> str. DSM 11853      | 0.03969289 | 0.04559579 |
| Proteobacteria  | sf_1 | 6953  | <i>Caulobacter</i> sp. str. FWC21                | 0.03984788 | 0.04565008 |
| Actinobacteria  | sf_1 | 1931  | <i>Actinoplanes utahensis</i> str. ATCC 31044    | 0.03985772 | 0.04565008 |
| Proteobacteria  | sf_1 | 6830  | coal effluent wetland clone RCP124               | 0.0401769  | 0.04594787 |
| Proteobacteria  | sf_1 | 6888  | hydrothermal vent strain str. TB66               | 0.04023778 | 0.04594982 |
| Proteobacteria  | sf_3 | 8689  | <i>Dyemonas todaii</i> str. XD10                 | 0.04034329 | 0.04595196 |
| Proteobacteria  | sf_3 | 10454 | <i>Helicobacter pullorum</i> str. NCTC 12826     | 0.04035801 | 0.04595196 |
| AD3             | sf_1 | 2338  | uranium mining waste pile soil clone JG30-KF-C12 | 0.04054423 | 0.04609641 |
| Proteobacteria  | sf_3 | 7275  | Mammoth cave clone CCU18                         | 0.04078195 | 0.04617004 |
| Proteobacteria  | sf_3 | 10417 | temperate estuarine mud clone KM61               | 0.04086477 | 0.04617004 |
| Proteobacteria  | sf_1 | 9588  | <i>Pseudomonas citronellolis</i> str. TERIDB18   | 0.04094763 | 0.04617004 |
| Proteobacteria  | sf_1 | 7919  | strain isolate str. rM4                          | 0.04094931 | 0.04617004 |
| Verrucomicrobia | sf_1 | 760   | Mono lake clone ML316M-1                         | 0.04097731 | 0.04617004 |
| Actinobacteria  | sf_1 | 1689  | <i>Actinoplanes yunnanensis</i> str. IFO 14459T  | 0.04099249 | 0.04617004 |
| Proteobacteria  | sf_3 | 8114  |                                                  | 0.04114307 | 0.04617004 |
| Proteobacteria  | sf_1 | 8999  | <i>Photobacterium leiognathi</i> str. LN101      | 0.04124415 | 0.04617004 |

|                |       |       |                                                                                    |            |            |
|----------------|-------|-------|------------------------------------------------------------------------------------|------------|------------|
| Firmicutes     | sf_12 | 4267  | termite gut clone Rs-114                                                           | 0.04125015 | 0.04617004 |
| Cyanobacteria  | sf_5  | 4967  | Toolik Lake main station at 3 m depth clone TLM14                                  | 0.04126067 | 0.04617004 |
| Proteobacteria | sf_1  | 10010 | uranium mining waste pile clone JG37-AG-139 proteobacterium                        | 0.04126302 | 0.04617004 |
| Proteobacteria | sf_1  | 8662  |                                                                                    | 0.04140996 | 0.04626779 |
| Proteobacteria | sf_1  | 8105  | <i>Hydrogenophaga taeniospiralis</i> str. ATCC 49743                               | 0.04160483 | 0.04638172 |
| Proteobacteria | sf_1  | 7140  | <i>Loktanella salsilacus</i> str. LMG 22000                                        | 0.04166576 | 0.04638172 |
| Actinobacteria | sf_1  | 1862  | endemic to Mojave Desert isolate str. AS3138 AS3138                                | 0.04169111 | 0.04638172 |
| Proteobacteria | sf_1  | 8058  | <i>Herbaspirillum seropedicae</i> str. DSM 6445 ATCC 35892                         | 0.0418595  | 0.04650242 |
| Proteobacteria | sf_1  | 7949  | Variovorax paradoxus TG27                                                          | 0.04203866 | 0.04650639 |
| Firmicutes     | sf_5  | 2681  | termite gut homogenate clone Rs-K41 bacterium                                      | 0.0420596  | 0.04650639 |
| Firmicutes     | sf_12 | 4459  | termite gut clone Rs-109                                                           | 0.04208714 | 0.04650639 |
| Actinobacteria | sf_1  | 1350  | <i>Rhodococcus ruber</i> str. DSM43338                                             | 0.04213463 | 0.04650639 |
| Proteobacteria | sf_1  | 7597  | <i>Sphingomonas</i> sp. str. DhA-95                                                | 0.04216251 | 0.04650639 |
| Proteobacteria | sf_1  | 6708  | <i>Roseomonas</i> sp. str. SAFR-014                                                | 0.04238912 | 0.04658625 |
| Proteobacteria | sf_1  | 7016  | <i>Sphingomonas</i> sp. str. SAFR-027                                              | 0.04241359 | 0.04658625 |
| Spirochaetes   | sf_1  | 6568  | <i>Spirochaeta</i> sp                                                              | 0.0424149  | 0.04658625 |
| Actinobacteria | sf_1  | 1120  | <i>Actinoplanes violaceus</i> str. IMSNU 22136                                     | 0.0425212  | 0.04660058 |
| Proteobacteria | sf_1  | 7500  | Great Artesian Basin clone B35                                                     | 0.04254797 | 0.04660058 |
| Proteobacteria | sf_1  | 7009  |                                                                                    | 0.04294923 | 0.04697381 |
| Actinobacteria | sf_1  | 1209  | <i>Gordonia</i> sp. str. J4                                                        | 0.04315743 | 0.04707322 |
| Firmicutes     | sf_4  | 2398  | deep marine sediment clone MB-C2-106                                               | 0.04316136 | 0.04707322 |
| Actinobacteria | sf_1  | 1787  | <i>Nocardia pseudovaccinii</i> str. DSM 43406                                      | 0.04322812 | 0.0470799  |
| Firmicutes     | sf_17 | 926   |                                                                                    | 0.0433188  | 0.04711258 |
| Acidobacteria  | sf_14 | 6424  | sphagnum peat bog clone K-5b10                                                     | 0.04348751 | 0.04719842 |
| Proteobacteria | sf_3  | 9671  | hydrothermal sediment clone AF420357                                               | 0.04351928 | 0.04719842 |
| Proteobacteria | sf_3  | 8604  | <i>Moraxella oblonga</i> str. IAM 14971                                            | 0.04365561 | 0.04728024 |
| Proteobacteria | sf_1  | 7537  | lichen-dominated Antarctic cryptoendolithic community clone FBP255 proteobacterium | 0.0437679  | 0.04731943 |
| Proteobacteria | sf_1  | 6750  | isolate str. '#33 orange'                                                          | 0.04382619 | 0.04731943 |
| Actinobacteria | sf_1  | 1786  | <i>Streptomyces bikiniensis</i> str. DSM40581                                      | 0.04387461 | 0.04731943 |
| Actinobacteria | sf_1  | 1598  | lichen-dominated Antarctic cryptoendolithic community clone FBP402                 | 0.04405086 | 0.0473996  |
| Firmicutes     | sf_12 | 4610  | <i>Clostridium putrefaciens</i> str. DSM 1291                                      | 0.0441394  | 0.0473996  |

|                |        |       |                                                                         |            |            |
|----------------|--------|-------|-------------------------------------------------------------------------|------------|------------|
| Proteobacteria | sf_1   | 6783  | <i>Roseomonas genomospecies</i> 4 strain isolate str. ATCC 49959 4      | 0.04416002 | 0.0473996  |
| Proteobacteria | sf_3   | 10462 | <i>Helicobacter rodentium</i> str. MIT 96-1312                          | 0.04425957 | 0.0473996  |
| Fusobacteria   | sf_3   | 1034  | <i>Ilyobacter tartaricus</i> str. DSM 2382 T                            | 0.04427464 | 0.0473996  |
| Firmicutes     | sf_5   | 134   | <i>Peptoniphilus asaccharolyticus</i> str. CCUG 9988                    | 0.04431518 | 0.0473996  |
| Proteobacteria | sf_1   | 8062  | <i>Brackiella oedipodis</i> str. LMG 1945 R8846                         | 0.04477197 | 0.04782231 |
| Proteobacteria | sf_1   | 8798  | <i>Vibrio aestuarianus</i> str. KT0901                                  | 0.04485142 | 0.04784136 |
| Bacteroidetes  | sf_19  | 5891  | <i>Hymenobacter</i> group clone KL-59-7-9                               | 0.04505183 | 0.04798921 |
| Chloroflexi    | sf_1   | 765   | anaerobic bioreactor clone SHD-71                                       | 0.04519066 | 0.04807116 |
| Firmicutes     | sf_12  | 2786  | <i>Clostridium glycolicum</i> str. CIN5                                 | 0.04528844 | 0.04810926 |
| Proteobacteria | sf_3   | 8838  | <i>Psychrobacter psychrophilus</i> CMS 28                               | 0.04538889 | 0.0481501  |
|                |        |       | <i>Corynebacterium coyleae</i> National Microbiology Laboratory Special |            |            |
| Actinobacteria | sf_1   | 1443  | identifier 97-0171                                                      | 0.04558497 | 0.04825177 |
| Proteobacteria | sf_1   | 7786  | <i>Polaromonas vacuolata</i> str. 34-P                                  | 0.045609   | 0.04825177 |
| Proteobacteria | sf_1   | 7285  | <i>Sphingopyxis chilensis</i> str. S37                                  | 0.04594248 | 0.04841221 |
| Bacteroidetes  | sf_1   | 5601  | <i>Sphingobacterium multivorum</i> str. OM-A8                           | 0.04598246 | 0.04841221 |
| Actinobacteria | sf_1   | 1191  | <i>Gordonia amarae</i> str. DSM43392                                    | 0.0459953  | 0.04841221 |
| Acidobacteria  | sf_14  | 208   | uranium mill tailings soil sample clone GuBH2-AD-9 sp.                  | 0.04601746 | 0.04841221 |
| Proteobacteria | sf_1   | 7523  | <i>Rhodovulum euryhalinum</i> str. DSM4868                              | 0.04607237 | 0.04841221 |
| Proteobacteria | sf_1   | 7308  | EBPR sludge lab scale clone HP1B39                                      | 0.04619338 | 0.04847377 |
| Actinobacteria | sf_1   | 1852  | <i>Tonsillophilus suis</i> str. HT1-19                                  | 0.0463106  | 0.04853119 |
| Proteobacteria | sf_6   | 6920  | <i>Pseudovibrio denitrificans</i> str. DN34                             | 0.04658114 | 0.04874892 |
|                |        |       | Isolation and identification hyper-ammonia producing swine storage      |            |            |
| Firmicutes     | sf_5   | 2797  | pits manure                                                             | 0.04692793 | 0.04896982 |
| Proteobacteria | sf_1   | 7262  | <i>Paracoccus pantotrophus</i> str. TUT1022                             | 0.04700245 | 0.04896982 |
| Proteobacteria | sf_1   | 7075  | <i>Novosphingobium</i> sp. str. K16                                     | 0.04706708 | 0.04896982 |
| Firmicutes     | sf_5   | 393   | <i>Anaerococcus vaginalis</i> str. CCUG 31349                           | 0.04708812 | 0.04896982 |
| Unclassified   | sf_160 | 10012 |                                                                         | 0.04723011 | 0.04896982 |
| Spirochaetes   | sf_1   | 6476  | termite gut clone NkS50                                                 | 0.04729219 | 0.04896982 |
| Planctomycetes | sf_4   | 4694  | USA: Colorado Fort collins Horsetooth Reservoir clone HT2F11            | 0.04734873 | 0.04896982 |
| Proteobacteria | sf_1   | 9218  | <i>Pseudoalteromonas haloplanktis</i> str. ATCC 14393                   | 0.04735076 | 0.04896982 |
| Acidobacteria  | sf_14  | 6350  | soil isolate Ellin337                                                   | 0.04735978 | 0.04896982 |
| Bacteroidetes  | sf_1   | 5462  | <i>Flavobacterium omnivorum</i> str. AS 1.2747; JCM 11313               | 0.04748781 | 0.0490369  |
| Firmicutes     | sf_1   | 3975  | Black raspberry witches'-broom phytoplasma str. BRWB witches'-          | 0.04804609 | 0.04946253 |

broom

|                |      |      |                                                     |            |            |
|----------------|------|------|-----------------------------------------------------|------------|------------|
| Proteobacteria | sf_1 | 7968 | <i>Oxalobacter formigenes</i> str. OXB ovinen rumen | 0.04805175 | 0.04946253 |
| Actinobacteria | sf_1 | 1742 | <i>Blastococcus saxobsidens</i> str. BC448          | 0.04809108 | 0.04946253 |
| Proteobacteria | sf_1 | 7585 | <i>Methylobacterium thiocyanatum</i> str. ALL/SCN-P | 0.04844701 | 0.04971796 |
| Proteobacteria | sf_1 | 7976 | <i>Nitrosomonas</i> sp. str. Nm86                   | 0.04846748 | 0.04971796 |

---

<sup>a</sup>S-F = subfamily; <sup>b</sup>Taxon ID = Phylochip taxon identification number; <sup>c</sup>Representative species = bacterial species identifier.

**Man's best friend?**

**The effect of pet ownership on house-dust microbial communities.**

**Online Repository**

<sup>1</sup>Fujimura, Kei E., Ph.D., <sup>2</sup>Johnson, Christine C. Ph.D., <sup>3</sup>Ownby, Dennis R., M.D., <sup>1</sup>Cox, Michael J., Ph.D., <sup>4</sup>Brodie, Eoin L., Ph.D., <sup>2</sup>Havstad, Suzanne L., M.A., <sup>5</sup>Zoratti, Edward M., M.D., <sup>2</sup>Woodcroft, Kimberley J., Ph.D., <sup>2</sup>Bobbitt, Kevin R., Ph.D., <sup>2</sup>Wegienka, Ganesa, Ph.D., <sup>6</sup>Boushey, Homer A., M.D., <sup>1\*</sup>Lynch, Susan V., Ph.D.

Division of <sup>1</sup>Gastroenterology, <sup>6</sup>Pulmonary and Critical Care, Department of Medicine, University of California, San Francisco, 513 Parnassus Ave., San Francisco, CA 94143; <sup>2</sup> Department of Biostatistics and Research Epidemiology, <sup>5</sup>Department of Internal Medicine, Division of Allergy and Immunology 1 Ford Place, Detroit Michigan 48202-3450; <sup>3</sup>Department of Pediatrics, Division of Allergy-Immunology, BG 1019, 1120 15th Street, Augusta, GA 30912-3790; <sup>4</sup>Center for Environmental Biotechnology, Lawrence Berkeley National Laboratory, Berkeley, CA.

Corresponding author: Susan Lynch, Ph.D., Tel. +415 4766784; Fax, +4154768841; Email: [susan.lynch@ucsf.edu](mailto:susan.lynch@ucsf.edu)

---

**Table E4. BLAST-based identity of fungal phlotypes.**

---

| <i>Ribotype</i> | <i>Accession No.</i> | <i>Phylum</i> | <i>Family</i>       | <i>Organism</i>                              | <i>% ID</i> |
|-----------------|----------------------|---------------|---------------------|----------------------------------------------|-------------|
| 1               | AY387144             | Basidiomycota |                     | <i>Malassezia restricta</i> strain CBS8747   | 99.4        |
| 1               | AM901797             | Basidiomycota |                     | environmental sample                         | 99.6        |
| 2               | GQ249171             | Ascomycota    | Dothideomycetidae   | <i>Alternaria alternata</i>                  | 99.8        |
| 2               | AF502815             | Ascomycota    |                     | root endophyte                               | 99.2        |
| 3               | AB273527             | Ascomycota    | Erysiphaceae        | <i>Blumeria graminis</i>                     | 100         |
| 4               | EU035422             |               |                     | <i>Exophilia</i> sp.                         | 100         |
| 5               | FJ235087             | Ascomycota    | Pleosporomycetidae  | <i>Cochliobolus</i> sp.                      | 99.8        |
| 5               | EU568925             | Ascomycota    | Metschnikowiaceae   | <i>Clavisporea lusitaniae</i>                | 98.4        |
| 6               | AB273527             | Ascomycota    | Erysiphaceae        | <i>Blumeria graminis</i>                     | 100         |
| 6               | AJ876482             | Ascomycota    | Dothideomycetidae   | <i>Cladosporium cladosporioides</i>          | 99.8        |
| 6               | FJ213499             |               |                     | Uncultured soil fungus                       | 99.8        |
| 6               | AM262377             |               |                     | Fungal endophyte                             | 99.5        |
| 7               | DQ156341             | Ascomycota    | Dothideomycetidae   | <i>Alternaria alternata</i> group            | 99.8        |
| 7               | DQ156337             | Ascomycota    | Dothideomycetidae   | <i>Alternaria longipes</i>                   | 99.8        |
| 8               | EF589865             | Ascomycota    | Dothideomycetidae   | <i>Davidiella tassiana</i>                   | 100         |
| 8               | EU167591             | Ascomycota    | Dothideomycetidae   | <i>Davidiella macrospora</i>                 | 100         |
| 8               | DQ420994             |               |                     | Uncultured fungal clone                      | 100         |
| 9               | AY843154             | Ascomycota    | Herpotrichiellaceae | <i>Phaeococcomyces nigricans</i>             | 99.6        |
| 10              | AM231398             | Ascomycota    | Pleosporomycetidae  | <i>Leptosphaerulina chartarum</i>            | 100         |
| 10              | EF621565             | Basidiomycota | Tremellomycetidae   | <i>Cryptococcus</i> sp.                      | 91.8        |
| 10              | EF505566             |               |                     | Uncultured endophyte                         | 99.7        |
| 11              | AJ244257             | Ascomycota    | Dothideomycetidae   | <i>Pringsheimia smilacis</i>                 | 96.5        |
| 12              | AF444614             | Basidiomycota |                     | <i>Rhodotorula mucilaginosa</i>              | 99.8        |
| 13              | AM902044             | Basidiomycota |                     | Uncultured basidiomycota                     | 99.6        |
| 13              | EU516849             | Basidiomycota | Tremellomycetidae   | <i>Cryptococcus</i> sp./environmental sample | 98.1        |
| 14              | AM901819             | Basidiomycota |                     | Uncultured basidiomycota                     | 99.5        |
| 15              | FJ553803             | Basidiomycota | Suillaceae          | Uncultured <i>Suillus</i> clone              | 95.3        |



|    |          |                      |                    |                                                            |      |
|----|----------|----------------------|--------------------|------------------------------------------------------------|------|
| 16 | AF393706 | Ascomycota           | Dothideomycetidae  | <i>Davidiella tassiana</i>                                 | 100  |
| 16 | EU167591 | Ascomycota           | Dothideomycetidae  | <i>Davidiella macrospora</i>                               | 100  |
| 17 | AM902044 | Basidiomycota        |                    | Uncultured basidiomycota                                   | 100  |
| 17 | EU516849 | Basidiomycota        | Tremellomycetidae  | Uncultured <i>Cryptococcus</i> clone                       | 100  |
| 18 | AY573212 | Ascomycota           | Botryosphaeriaceae | <i>Botryosphaeria sarmentorum</i> strain IMI 63581b        | 99.6 |
| 19 | AB470831 | Ascomycota           | Pleosporomycetidae | <i>Alternaria alternata</i>                                | 99.6 |
| 20 | DQ000318 | Basidiomycota        | Tremellomycetidae  | <i>Cryptococcus tephrensensis</i>                          | 97.9 |
| 21 | AM231398 | Ascomycota           | Pleosporomycetidae | <i>Leptosphaerulina chartarum</i>                          | 100  |
| 21 | FJ450002 |                      |                    | Fungal endophyte                                           | 100  |
| 22 | AY739113 | Ascomycota           | Erysiphaceae       | <i>Podosphaera fusca</i>                                   | 100  |
| 23 | AB470872 | Ascomycota           | Pleosporomycetidae | <i>Alternaria alternata</i>                                | 99.6 |
| 24 | EU484245 | Fungi incertae sedis | Mucoraceae         | <i>Mucor plumbeus</i> strain FSU                           | 99.7 |
| 25 | EF619719 | Ascomycota           | Orbiliaceae        | Uncultured Orbiliaceae clone                               | 92.1 |
| 25 | EU516806 |                      |                    | environmental sample                                       | 91   |
| 26 | AM160642 | Basidiomycota        |                    | <i>Rhodotorula glutinis</i>                                | 100  |
| 26 | AF444638 | Basidiomycota        |                    | <i>Rhodotorula</i> sp. KB 651                              | 100  |
| 27 | EU516903 |                      |                    | uncultured fungal clone                                    | 94.4 |
| 27 | EU810056 | Basidiomycota        | Ceratobasidiaceae  | <i>Ceratobasidium noxium</i> strain CBS154-35              | 91.6 |
| 28 | AB470823 | Ascomycota           | Pleosporomycetidae | <i>Alternaria alternata</i>                                | 100  |
| 29 | EF652065 | Ascomycota           | Eurotiomycetidae   | <i>Aspergillus reptans</i>                                 | 100  |
| 29 | AF459728 | Ascomycota           | Eurotiomycetidae   | <i>Eurotium niveoglaucum</i>                               | 100  |
| 29 | AY373890 | Ascomycota           | Eurotiomycetidae   | <i>Eurotium</i> strain ATCC 66457                          | 100  |
| 30 | AY213649 | Ascomycota           | Eurotiomycetidae   | <i>Eurotium rubrum</i> strain UWFP 756                     | 100  |
| 30 | AM999715 |                      |                    | Uncultured fungus                                          | 90   |
| 30 | FJ758576 |                      |                    | Uncultured fungus                                          | 99.6 |
| 30 | AY605709 | Basidiomycota        |                    | Basidiomycete sp.                                          | 83.8 |
| 31 | EU484245 | Ascomycota           | Mucoraceae         | <i>Mucor plumbeus</i> strain FSU 6178                      | 99.7 |
| 32 | DQ388849 |                      |                    | Uncultured fungus                                          | 91.2 |
| 32 | AY035665 |                      |                    | Glomeromycota sp.                                          | 89.9 |
| 32 | EF619688 | Ascomycota           |                    | Ascomycota sp.                                             | 89.2 |
| 33 | EU326196 | Ascomycota           | Mucoraceae         | <i>Mucor hiemalis</i> f. <i>hiemalis</i> strain CBS 242.35 | 99.5 |
| 34 | AB105432 | Basidiomycota        | Tremellomycetidae  | <i>Cryptococcus carnescens</i>                             | 100  |
| 35 | AJ876481 | Ascomycota           | Dothideomycetidae  | <i>Aureobasidium pullulans</i>                             | 100  |

|    |          |            |                   |                                                 |      |
|----|----------|------------|-------------------|-------------------------------------------------|------|
| 35 | EU167608 | Ascomycota | Dothideomycetidae | <i>Kabatiella microsticta</i> strain CBS 342.66 | 100  |
| 36 | FJ904830 | Ascomycota | Eurotiomycetidae  | <i>Eurotium niveoglaucum</i> strain Gr136B      | 96.8 |

---
